# 1 **Telomere elongation in the gut extends zebrafish lifespan**

2  
3 Mounir El Maï<sup>1,2</sup>, Jean-Marie Guigonis<sup>3</sup>, Thierry Pourchet<sup>3</sup>, Da Kang<sup>4</sup>, Jia-Xing Yue<sup>4</sup>, Miguel  
4 Godinho Ferreira<sup>1,2</sup>

5  
6  
7 <sup>1</sup> Institute for Research on Cancer and Aging of Nice (IRCAN), CNRS UMR7284 INSERM  
8 U1081 Université Côte d'Azur, 06107 Nice, France.

9 <sup>2</sup> Instituto Gulbenkian de Ciência, 2780-156 Oeiras, Portugal.

10 <sup>3</sup> Laboratory Transporter in Imaging and Radiotherapy in Oncology (TIRO), Institut des  
11 sciences du vivant Frederic Joliot, Commissariat à l'Energie Atomique et aux Energies  
12 alternatives (CEA), Université Côte d'Azur, 06107 Nice, France

13 <sup>4</sup> State Key Laboratory of Oncology in South China, Collaborative Innovation Center for  
14 Cancer Medicine, Sun Yat-sen University Cancer Center, Guangzhou, China.

15  
16  
17  
18  
19  
20  
21  
22  
23  
24  
25  
26  
27  
28  
29 Corresponding author: [Miguel-Godinho.FERREIRA@unice.fr](mailto:Miguel-Godinho.FERREIRA@unice.fr)

30  
31 **Keywords:** Aging, Telomerase, Gut, Tissue-specific, Systemic effects, Zebrafish

32

33 ABSTRACT: (150 words 1116 char)

34 Telomere shortening is a hallmark of aging and is counteracted by telomerase. The gut  
35 is one of the earliest organs to exhibit short telomeres and tissue dysfunction during normal  
36 zebrafish aging. This is recapitulated in prematurely aged telomerase mutants (*tert*<sup>-/-</sup>). Here,  
37 we show that gut-specific telomerase activity in *tert*<sup>-/-</sup> zebrafish prevents premature aging.  
38 Induction of telomerase rescues gut senescence and low cell proliferation to wild-type levels,  
39 while restoring gut tissue integrity, inflammation, and age-dependent gut microbiota dysbiosis.  
40 Remarkably, averting gut dysfunction results in a systemic beneficial impact. Gut-specific  
41 telomerase activity rescues premature aging markers in remote organs, such as the reproductive  
42 (testes) and hematopoietic (kidney marrow) systems. Functionally, it also rescues age-  
43 dependent loss of male fertility and testes atrophy. Finally, we show that gut-specific telomerase  
44 activity increases the lifespan of telomerase mutants. Our work demonstrates that delaying  
45 telomere shortening in the gut is sufficient to systemically counteract aging in zebrafish.

46  
47

## 48 INTRODUCTION:

49 The discovery that lifespan can be genetically extended in *C. elegans*, initiated a new  
50 era of research aiming to define interventions that promote lifespan and healthspan extension<sup>1</sup>.  
51 Since then, health and lifespan improvements have been achieved by modulating hallmarks of  
52 aging and provided promising therapeutical targets for healthy aging<sup>2</sup>. For example, reverting  
53 age-related deregulation of nutrient-sensing mechanisms by interventions such as caloric  
54 restriction or rapamycin (mTOR inhibitor) treatment was observed to increase lifespan in  
55 several species<sup>3,4</sup>. Similarly, genetic or pharmacologic removal of senescent cells can delay age-  
56 associated defects resulting in lifespan extension in mice<sup>5,6</sup>.

57 Telomere shortening and damage are major determinants contributing to aging<sup>2</sup>.  
58 Telomeres protect chromosome ends from degradation and recognition by DNA damage  
59 response pathways<sup>7</sup>. Due to the “end-replication problem”, telomeres gradually shorten with  
60 each round of cell division<sup>7</sup>. When telomeres become critically short, DNA damage responses  
61 are triggered and culminate in cell cycle arrest and, eventually, replicative senescence<sup>8,9</sup>.  
62 Consequently, reduced proliferation and accumulation of senescent cells result in loss of tissue  
63 integrity<sup>2</sup>. Telomere shortening is counteracted by a specific reverse transcriptase termed  
64 telomerase. Telomerase is a multi-subunit ribonucleoprotein, with TERT being its main  
65 catalytic component. TERT expression is limited mainly to stem or progenitor cells<sup>10,11</sup>.  
66 However, telomerase activity is insufficient to prevent telomere attrition during aging<sup>11</sup>.

67 Telomeropathy patients carry mutations in telomerase or telomere maintenance protein  
68 genes, which lead to premature shortening of telomeres and short life expectancy<sup>12,13</sup>. Similarly,  
69 telomerase deficiency in *tert*<sup>-/-</sup> zebrafish accelerates telomere shortening, leading to premature  
70 aging phenotypes and reduced lifespan already in the first generation<sup>14-16</sup>. The majority of tissue  
71 dysfunction events described during natural zebrafish aging are anticipated during *tert*<sup>-/-</sup>  
72 zebrafish aging<sup>14-16</sup>. The gut is one of the first organs to exhibit DNA damage associated with  
73 short telomeres, reduced cell proliferation, senescence and functional defects not only in natural  
74 aging but also throughout *tert*<sup>-/-</sup> life<sup>14,17</sup>. Importantly, telomere shortening accelerates cellular  
75 and functional defects in the gut at a time when other organs remain clear of tissue

76 dysfunction<sup>14</sup>. As in zebrafish, the human gastrointestinal system is one of the organs with the  
77 fastest rate of telomere shortening<sup>18</sup>. Telomeropathy patients are often associated with  
78 gastrointestinal syndromes<sup>19,20</sup> and increased telomere shortening was observed in the intestinal  
79 epithelium of inflammatory bowel disease patients<sup>21,22</sup>. Therefore, gut homeostasis is intricately  
80 connected to telomere length.

81 A crucial role of gut homeostasis has been described for organism health. Loss of gut  
82 permeability is involved in several disorders such as inflammatory bowel disease, diabetes,  
83 chronic heart failure and even Parkinson disease<sup>4</sup>. Modification of gut microbiota content  
84 (dysbiosis) is associated to aging<sup>23,24</sup> and is involved in age-related systemic inflammation<sup>25</sup>.  
85 Even though weakening of the intestinal barrier is as major feature of gut aging<sup>4</sup>, it remains  
86 unclear whether gut aging influences overall organismal aging. Inflammatory and SASP  
87 (senescence-associated secretory phenotype) factors chronically emanating from intestinal  
88 epithelium with critically short telomeres may impact systemic homeostasis.

89 Considering that the gut is one of the first organs exhibiting telomere-dependent aging,  
90 we anticipated that delaying gut aging would be beneficial for the entire organism. Here, we  
91 present a novel vertebrate model aimed at investigating the impact of telomere-dependent gut  
92 aging on the entire organism. Using a zebrafish line containing a Cre-inducible and gut-specific  
93 *tert* transgene, we show that enterocyte-specific telomerase activity in *tert*<sup>-/-</sup> fish is sufficient  
94 to delay gut aging. Counteracting gut aging improves health of the entire organism, reverting  
95 gut microbiota dysbiosis and aging phenotypes in the reproductive and hematopoietic system  
96 of *tert*<sup>-/-</sup> zebrafish. Finally, we show that the most relevant systemic effect of gut-specific  
97 telomerase activity is lifespan extension. Thus, gut telomere-dependent aging controls aging of  
98 the entire organism.

99

100

## 101 **RESULTS:**

### 102 **Tissue-specific telomerase activity rescues gut aging**

103 As in humans, the zebrafish gut is one of the organs to exhibit fast telomere length  
104 decline<sup>14,18</sup>. To investigate how telomere-dependent gut aging impacts the organism, we  
105 generated a Cre-inducible zebrafish transgenic line with gut-specific *tert* expression. This line  
106 contains an enterocyte-specific Fabp-2 promoter<sup>26</sup> upstream of a lox-STOP-lox cassette  
107 followed by zebrafish *tert* cDNA in an *tert*<sup>+/-</sup> genetic background (Figure 1A). After crossing  
108 this line with *tert*<sup>+/-</sup> fish, we induced the *tert* transgene expression by micro-injection of *Cre*  
109 mRNA in one-cell stage embryos. Mock injected fish were used as controls for injection and  
110 transgene genomic position effects. This experimental set up provided sibling fish that were  
111 either *tert*<sup>-/-</sup> containing the full construct (“*tert*<sup>-/-</sup> No Cre”; from mock injected embryos), *tert*<sup>-/-</sup>  
112 expressing *tert* transgene (“*tert*<sup>-/-</sup> +Cre”, from *Cre* mRNA injected embryos), and *tert*<sup>+/+</sup>  
113 containing the full construct (“WT”; from mock injected embryos). Thus, this line allows us to  
114 investigate the effects of telomerase activity specifically in the gut of telomerase deficient fish.  
115 While we did not detect expression in mock injected fish, Cre-mediated removal of the STOP  
116 cassette triggered the transcription of *tert* transgene in gut tissue (Figure 1B; left panel). This  
117 led to ~5-fold enrichment of total *tert* mRNA (endogenous and transgene *tert* mRNA) in

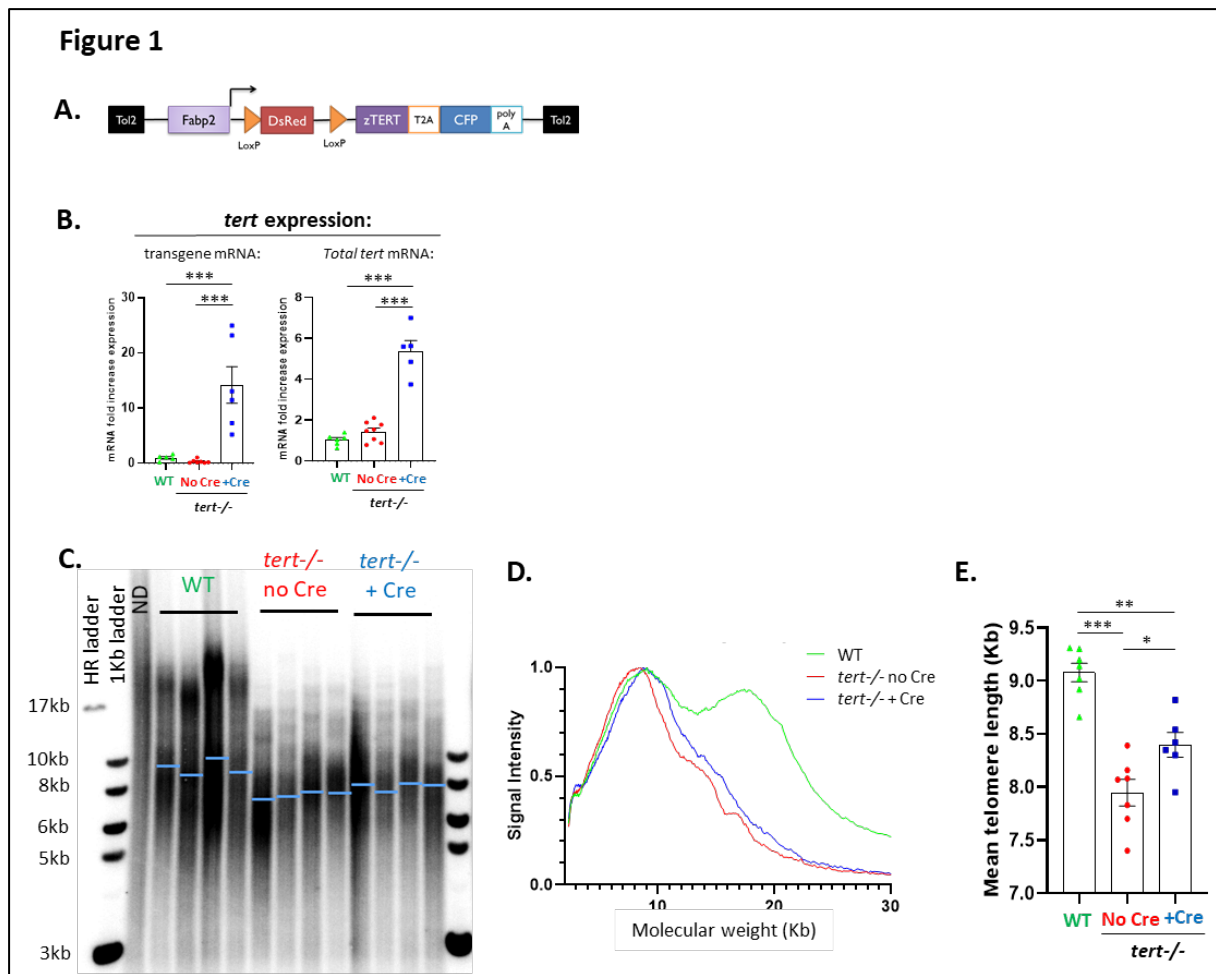

**Figure 1: Cre-mediated *tert* expression extend telomere length in *tert*<sup>-/-</sup> gut tissue.**

**A.** Schematic representation of the transgene allowing for a Cre inducible and enterocyte specific expression of *tert* mRNA. We created a zebrafish line containing an enterocyte-specific promoter (*Fabp2*: fatty acid binding protein 2) controlling DsRed gene expression flanked by two LoxP sites. Tert-T2A-CFP polycistronic gene was added downstream of the second LoxP site. **B.** RT-qPCR analysis of *tert* transgene mRNA and total *tert* mRNA (endogenous + transgene) expression in 9-month-old gut extracts. RT-qPCR graphs are representing mean  $\pm$  SEM mRNA fold increase after normalization by *rps11* gene expression levels (N=5-8; \*\*\* p-value<0.001, using one-way ANOVA and post-hoc Tuckey tests). Cre mRNA injection at one cell-stage embryos induces the transcription of *tert* transgene mRNA. **C.** Representative images of telomere restriction fragment (TRF) analysis by Southern Blot of genomic DNA extracted from 9-month-old gut samples and quantifications of mean telomere length (blue bars). **D.** TRF mean densitometry curves (N= 6-7). **E.** Quantification of mean telomere length analyzed by TRF. Cre-mediated and enterocyte specific *tert* expression elongated telomere length in gut of *tert*<sup>-/-</sup> fish. Data are represented as mean  $\pm$  SEM (N=6-7; \* p-value<0.05; \*\* p-value<0.01, \*\*\* p-value<0.001, using one-way ANOVA and post-hoc Tuckey tests).

the gut of *tert*<sup>-/-</sup> +Cre fish when compared to mock injected control tissues (*tert*<sup>-/-</sup> No Cre and WT) (Figure 1B; right panel). To test whether expression of the *tert* transgene is sufficient to prevent telomere shortening, we performed Telomere Restriction Fragment (TRF) analysis on gut samples of 9-month-old fish. As previously shown, we observed that the range of telomere length in the gut of WT fish exhibits a bimodal pattern (Figure 1C-D)<sup>14,15</sup>. This pattern reflects the differences in telomere length between cell types. Telomere length of WT blood cells is longer (~19 kb) than other tissues (~9 kb) leading to a densitometry pattern with two peaks<sup>14,15</sup>. Reflecting the requirement of telomerase activity to sustain long telomeres in blood cells,

142 telomere length of *tert*<sup>-/-</sup> blood cells is drastically reduced compared to WT (as seen by the loss  
143 of the longer telomere peak, Figure 1D)<sup>14,15</sup>. Consequently, *tert*<sup>-/-</sup> No Cre presented a unimodal  
144 TRF pattern in the intestinal tissue. Even though expression of *tert* cDNA driven by the Fabp-  
145 2 promoter did not fully restore telomere length to WT levels, induction of the *tert* transgene is  
146 sufficient to elongate telomeres in whole gut tissues of *tert*<sup>-/-</sup> +Cre fish (7.9 kb to 8.4 kb, N=6-  
147 7; p<0.05; Figure 1E). Like *tert*<sup>-/-</sup> No Cre fish, *tert*<sup>-/-</sup> +Cre fish lacked the higher molecular  
148 weight telomere peak, indicating that the *tert* transgene is not expressed in blood cells.

149 Described as a hallmark of aging, telomere erosion has been proposed as a “molecular  
150 clock” defining the number of cell divisions before cell cycle arrest, cell death or replicative  
151 senescence<sup>2</sup>. Reduced cell proliferation and accumulation of senescent cells limits homeostatic  
152 regeneration and, consequently, causes loss of tissue integrity. In agreement, accelerated  
153 telomere shortening in *tert*<sup>-/-</sup> fish results in premature aging phenotypes<sup>14</sup>. In order to test  
154 whether *tert* transgene expression in the gut of *tert*<sup>-/-</sup> fish rescues local aging defects, we  
155 analysed the gut of 9-month-old fish. As previously reported, compared to WT fish, the gut of  
156 *tert*<sup>-/-</sup> No Cre fish showed a reduced proliferation rate<sup>14,15</sup>. Notably, enterocyte-specific  
157 telomerase activity rescued the proliferative capacity of this organ to WT levels (Figure 2A).  
158 Similarly, SA-β-galactosidase assays and transcription levels of the senescence-associated  
159 genes *p15/16* and *p21* revealed that telomerase activity reduces cell senescence to WT levels  
160 (Figure 2B-D). We previously described a cell fate switch from apoptosis to senescence in old  
161 *tert*<sup>-/-</sup> where senescence becomes predominant<sup>17</sup>. At that age, onset of apoptosis becomes  
162 indistinguishable between WT and *tert*<sup>-/-</sup>. Consistently, we detected no difference in number  
163 of apoptotic cells in the intestinal epithelium at 9 months of age between WT, *tert*<sup>-/-</sup> No Cre  
164 and *tert*<sup>-/-</sup> +Cre fish (Supplementary figure 1A).

165 These cellular defects observed in *tert*<sup>-/-</sup> fish impact tissue integrity<sup>14,15,17</sup>. We observed  
166 that 9-month-old *tert*<sup>-/-</sup> No Cre fish exhibit morphological tissue defects with thickening of the  
167 *lamina propria* as compared to WT (Figure 2E-F). Loss of intestinal barrier integrity leads to  
168 activation of the YAP (Yes-associated protein) transcription factor responsible for tissue  
169 regeneration<sup>27,28</sup>. Consistent with loss of gut integrity, expression of the YAP-target genes  
170 *cyr61* and *ctgf* are increased in *tert*<sup>-/-</sup> No Cre fish compared to WT (Figure 2G-H). Likewise,  
171 *claudin-2* mRNA levels are higher in *tert*<sup>-/-</sup> No Cre compared to WT (Figure 2I). Increased  
172 gene expression of the tight-junction protein Claudin-2 occurs during primate aging and  
173 enhances *in vivo* intestinal permeability<sup>29,30</sup>. Strikingly, all these phenotypes were rescued in  
174 *tert*<sup>-/-</sup> +Cre fish (Figure 2E-I). As a consequence of loss of intestinal integrity, we observed  
175 higher inflammation in the intestinal epithelium of the *tert*<sup>-/-</sup> No Cre fish as compared to WT.  
176 We detected an increased infiltration of eosinophiles (Figure 2J) and neutrophils (Figure 2K)  
177 in the gut of *tert*<sup>-/-</sup> No Cre fish. In line with a rescue of intestinal integrity, the number of these  
178 myeloid immune cells was similar to WT in *tert*<sup>-/-</sup> +Cre fish. Although not significant, gut-  
179 specific telomerase activity also ameliorates increased *il6* gene expression observed in *tert*<sup>-/-</sup>  
180 No Cre compared to WT (Figure 2L). Similarly, while no difference was detected in *tnfa* mRNA  
181 levels between *tert*<sup>-/-</sup> No Cre and WT, the expression of this inflammation-related gene is  
182 reduced in *tert*<sup>-/-</sup> +Cre fish (Figure 2M).



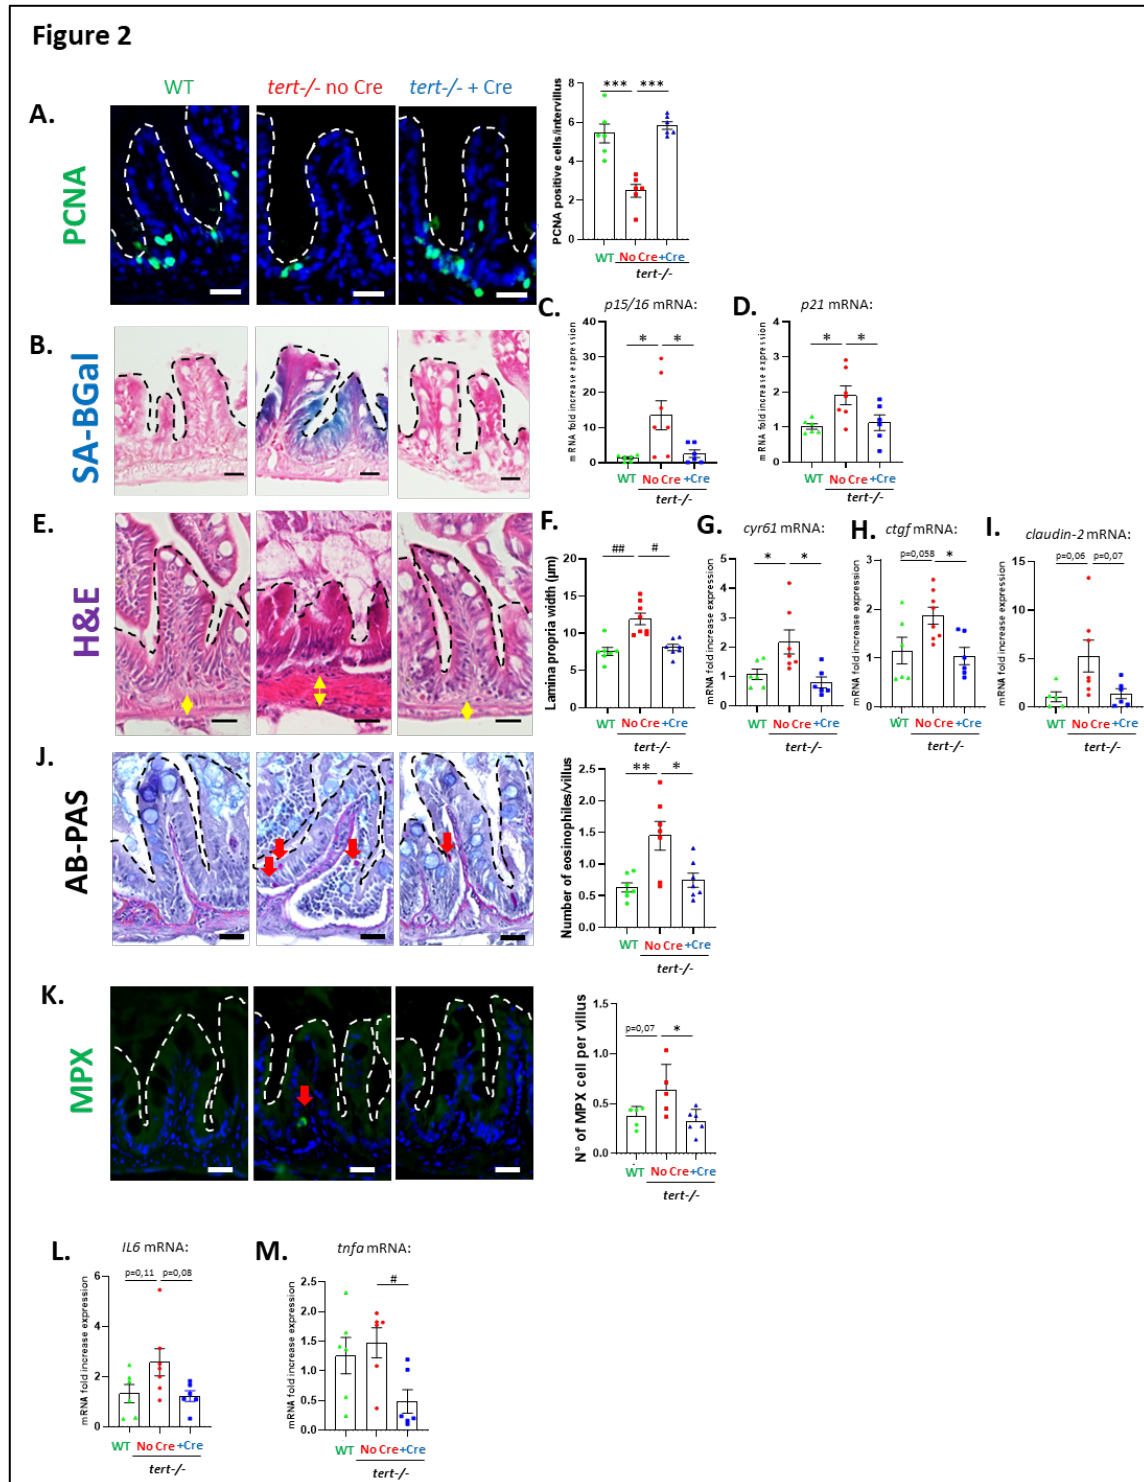

183

184

185

186

187

188

189

190

191

192

**Figure 2: Telomerase reactivation rescues gut aging phenotypes.**

**A.** Representative immunofluorescence images of proliferation staining (PCNA marker; left panel) and quantification (right panel) in 9-month-old gut tissues. **B.** Representative image of SA-βGal staining of 9-month-old gut cryosection. **C-D.** RT-qPCR analysis of senescence-associated genes *p15/16* (**C.**) and *p21* (**D.**) expression in 9-month-old gut samples. Telomere elongation in gut of *tert*<sup>-/-</sup> +Cre fish rescues both proliferation and senescence to WT levels compared to *tert*<sup>-/-</sup> No Cre fish. **E.** Representative hematoxylin and eosin-stained sections of gut from 9-month-old fish (yellow arrows delineate lamina propria width quantified in **F.**). **F.** Quantification of lamina propria width measured on histology images of 9-month-old fish gut. **G-H.** RT-qPCR analysis of YAP target genes *cyr61* (**G.**) and *ctgf* (**H.**) expression in 9-month-old gut samples. **I.** RT-qPCR analysis of the junction

193 protein associated gene *claudin-2* expression in 9-month-old gut samples. **J.** Representative AB-PAS staining  
194 images of 9-month-old fish gut (left panel). Number of pink-staining eosinophile cells (red arrows) are quantified  
195 in the right panel. **K.** Representative immunofluorescence images of neutrophil staining (MPX marker; left panel)  
196 and quantification (right panel) in 9-month-old gut tissues. **L-M.** RT-qPCR analysis of inflammation-associated  
197 genes *il6* (C.) and *tnfa* (D.) expression in 9-month-old gut samples. Telomere elongation in gut of *tert*<sup>-/-</sup> +Cre fish  
198 rescues gut integrity and consequent gut inflammation to WT levels compared to *tert*<sup>-/-</sup> No Cre fish. Scale bar:  
199 20µm. Dashed lines delineate gut villi. All data are represented as mean +/- SEM (N=6-8 per condition; \* p-  
200 value<0.05; \*\* p-value<0.01, \*\*\* p-value<0.001, using one-way ANOVA and post-hoc Tuckey tests; # p-  
201 value<0.05; ## p-value<0.01, ### p-value<0.001, using Kruskal-Wallis and post-hoc Dunn's tests). All RT-qPCR  
202 graphs are representing mean ± SEM mRNA fold increase after normalization by *rps11* gene expression levels.  
203

204 By comparing the expression profiles of whole gut tissues using RNA sequencing, we  
205 observed a distinguishable transcriptomic signature of *tert*<sup>-/-</sup> No Cre, while WT and *tert*<sup>-/-</sup> +Cre  
206 samples clustered together (Supplementary figure 2A). GO term analyses showed that,  
207 compared to *tert*<sup>-/-</sup> No Cre, both WT and *tert*<sup>-/-</sup> +Cre are enriched in gene expression related  
208 to cell cycle and ATP production in addition to reduced transcription of genes related to  
209 morphogenesis (Supplementary figure 2B-E). Accordingly, KEGG GSEA analyses showed an  
210 increase in ribosome and oxidative phosphorylation in these two groups compared to *tert*<sup>-/-</sup> No  
211 Cre, and a decrease of phagosome, cytokine signalling and neuroactive ligand receptor  
212 interaction which encompasses arachidonic inflammatory pathway (Supplementary figure 2F-  
213 G). In line with the previous results, these transcription profiles confirmed that telomerase  
214 activity rescued cell proliferation defects, loss of tissue integrity and inflammation seen in gut  
215 of *tert*<sup>-/-</sup> No Cre fish.  
216

### 217 **Local effects: Gut-specific telomerase activity rescues gut microbiota dysbiosis**

218 Gut microbiota dysbiosis is associated with a dysfunctional intestinal barrier and is  
219 proposed to generate a feed-forward loop involving gut permeability, inflammation and  
220 dysbiosis in aging<sup>25,31</sup>. However, it remains unclear whether delaying gut aging counteracts gut  
221 microbiota (GM) dysbiosis. To investigate if telomerase activity in the gut of *tert*<sup>-/-</sup> fish  
222 ameliorates gut dysbiosis, we performed high-throughput sequencing of the V3-4 region of  
223 16S-rDNA of 9-month-old zebrafish gut. Similar to what is described for human aging<sup>23,32</sup>, we  
224 observed diminished microbial diversity in *tert*<sup>-/-</sup> No Cre when compared to WT controls. Both  
225 alpha (within samples) and beta (within groups) analyses showed lower diversity in *tert*<sup>-/-</sup> No  
226 Cre individuals compared to WT and *tert*<sup>-/-</sup> +Cre fish (Figure 3A-B). According to a reduced  
227 beta-diversity, using principal coordinates analysis (PCoA), we observed a clustering of *tert*<sup>-/-</sup>  
228 No Cre samples while WT and *tert*<sup>-/-</sup> +Cre samples were more dispersed (Figure 3C).

229 Relative abundance analysis of bacterial taxonomic units (BTUs) at the class level  
230 revealed an overall alteration of GM composition in *tert*<sup>-/-</sup> No Cre fish compared to WT that  
231 was recovered by *tert* transgene expression (Figure 3D). At the class level, we observed in the  
232 *tert*<sup>-/-</sup> No Cre group a decreased abundance of Alpha-proteobacteria and Planctomycetes along  
233 with an enrichment in Gamma-proteobacteria, Bacteroidia and Fibrobacteria when compared  
234 to other groups (Figure 3D, Supplementary figure 3A). Interestingly, while Alpha-  
235 proteobacteria are known to inhibit host cell death and promote proliferation<sup>33</sup>, Gamma-  
236 proteobacteria expansion is associated with early age-dependent loss of intestinal barrier  
237 integrity in flies<sup>31</sup>.

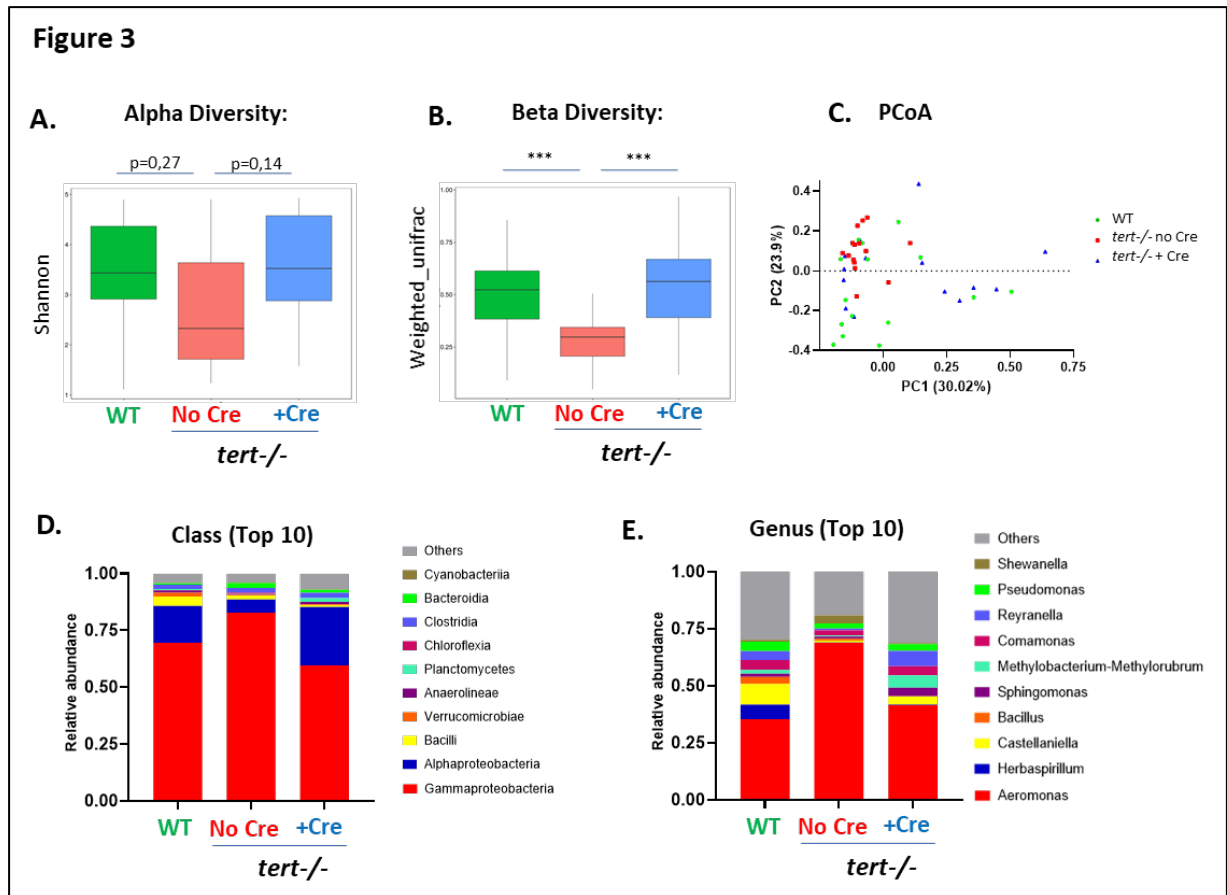

238  
239  
240  
241  
242  
243  
244  
245  
246  
247  
248  
249

**Figure 3: Gut specific telomerase activity rescues gut microbiota dysbiosis.**

**A.** Quantification of microbiome alpha diversity (within samples) using Shannon index (N=14-15; p-values were determine using Wilcoxon test) in the gut of 9-month-old fish. **B.** Quantification of microbiome beta diversity using weighed unifrac distance (within groups; N=14-15; \*\*\* p<0.001 using Tuckey test) in the gut of 9-month-old fish. **C.** Principal Coordinate Analysis (PCoA) of the beta diversity distance (weighted unifrac) in the gut of 9-month-old fish (N=14-15). **D.** Relative abundance of top 10 bacteria classes in the microbiome of the 3 different groups in the gut of 9-month-old fish (N=14-15). **E.** Relative abundance of top 10 bacteria genus in the microbiome of the 3 different groups in the gut of 9-month-old fish (N=14-15). Telomere elongation in gut of *tert-/-* +Cre fish rescues gut microbiota composition and diversity to WT levels compared to *tert-/-* No Cre fish which exhibit gut microbiota dysbiosis.

250 Similarly, at the genus level, Alpha-proteobacteria *Reyranella* and *Defluviimonas* were  
251 reduced while Gamma-proteobacteria *Aeromonas* and *Shewanella* along with *Bacteroides*, a  
252 Bacteroidia-related genus, were enriched in *tert-/-* No Cre fish when compared to other groups  
253 (Figure 3E; Supplementary figure 3B). Both *Shewanella* and *Aeromonas* genus were described  
254 as deleterious in human, with *Shewanella* causing intra-abdominal infections<sup>34</sup>, and *Aeromonas*  
255 being associated with inflammatory bowel diseases and inflammation<sup>35,36</sup>. Interestingly, within  
256 the *Aeromonas* genus, *A. veronii* species were strikingly overrepresented in *tert-/-* No Cre  
257 compared to the other groups (Supplementary figure 3C). From the Bacteroidia class, *B.*  
258 *uniformis*, *P. merdae* and *B. ovatus* were similarly enriched in *tert-/-* No Cre and can be  
259 considered as “pathobionts” that profit from a dysregulated environment to overtake  
260 commensal symbionts and become pathogenic<sup>37-39</sup>. Overall, the analysis of gut microbiota  
261 composition revealed a dysbiotic microbiota in the *tert-/-* No Cre containing less diverse and  
262 more pathogenic bacterial community compared to WT that was reverted by gut-specific  
263 telomerase activity.



264  
265  
266  
267  
268  
269  
270  
271  
272  
273  
274  
275  
276  
277  
278  
279  
280  
281  
282  
283  
284  
285  
286  
287  
288  
289  
290  
291  
292  
293  
294  
295  
296  
297  
298  
299  
300  
301  
302  
303  
304  
305

### Local effects: Gut-specific telomerase activity recovers tissue metabolic profile

Metabolomic analyses can determine the physiological and pathological status of a tissue by measuring metabolites representative of intrinsic and extrinsic factors. Changes in metabolism have been associated with aging and might reflect cellular defects, such as gradual mitochondrial dysfunction with age<sup>40,41</sup>. Similarly, we reported that, by 9 months of age, *tert*<sup>-/-</sup> gut is affected by mitochondrial dysfunction accompanied by lower ATP and high ROS levels<sup>17</sup>. In order to gain insight on the metabolic profile of *tert*<sup>-/-</sup> No Cre and the extent of metabolic improvement by telomerase activity, we performed a metabolic analysis of whole intestinal extracts.

Clustering analyses on metabolomic profiles revealed that both WT and *tert*<sup>-/-</sup> +Cre samples clustered tightly while *tert*<sup>-/-</sup> No Cre samples differed from other groups (Figure 4A-C). Notably, a significant number of metabolites were reduced (621) or enriched (141) in both WT and *tert*<sup>-/-</sup> +Cre when compared to *tert*<sup>-/-</sup> No Cre fish (Supplementary figure 4A). Consistent with our previous work<sup>17</sup>, we observed a drastic reduction of energetic metabolites in *tert*<sup>-/-</sup> No Cre such as ATP, ADP, NADH, NADPH and CoA compared to the other groups (Figure 4D). Following the anaerobic glycolysis pathway, we noticed lower levels of glucose-6-phosphate and fructose-1,6-bisphosphate and higher amounts of pyruvate and lactate (Supplementary figure 4B). Considering that glucose did not vary greatly between the groups, our results suggest that the gut of *tert*<sup>-/-</sup> No Cre acquired higher levels of anaerobic glycolysis. We also detected higher pentose shunt activity in *tert*<sup>-/-</sup> No Cre gut, evidenced by increased amounts of ribose-5-phosphate and erythrose-4-phosphate (Supplementary figure 4C). Interestingly, except for citrate levels, all the detected metabolites of the citric acid cycle were elevated in the *tert*<sup>-/-</sup> No Cre fish compared to the other genotypes (Supplementary figure 5A). Altogether, the gut energetic metabolism of *tert*<sup>-/-</sup> No Cre fish appears to be engaged in uncoupled oxidative phosphorylation, consistent with the previously observed damaged mitochondria and higher production of ROS and that, by expressing *tert* transgene in the gut, the metabolic alterations is reverted in the entire tissue.

Among the detected amino acids, methionine was significantly enriched in *tert*<sup>-/-</sup> No Cre gut compared to the other genotypes (Figure 4E). We also observed an overall increase in methionine metabolites in the mutant gut that might be allowed by higher levels of nicotinamides.

In line with our previous results depicting higher inflammation of *tert*<sup>-/-</sup> No Cre fish, we observed an overall increase in the arachidonic metabolism with higher levels of pro-inflammatory molecules, such as prostaglandins and leukotrienes (Figure 4F). Consistently, we detected lower amounts of anti-inflammatory resolvin D2 in *tert*<sup>-/-</sup> No Cre fish when compared to the other groups. Interestingly, the steroid pathway was also enriched in *tert*<sup>-/-</sup> No Cre fish. Not only the stress hormone cortisol but also female hormones (such as 16-Oxoestrone or Estradiol) were elevated in male *tert*<sup>-/-</sup> No Cre fish (Figure 4G). Overall, our unbiased metabolomic analysis described an altered metabolism profile in *tert*<sup>-/-</sup> No Cre that was recovered by gut-specific telomerase activity.

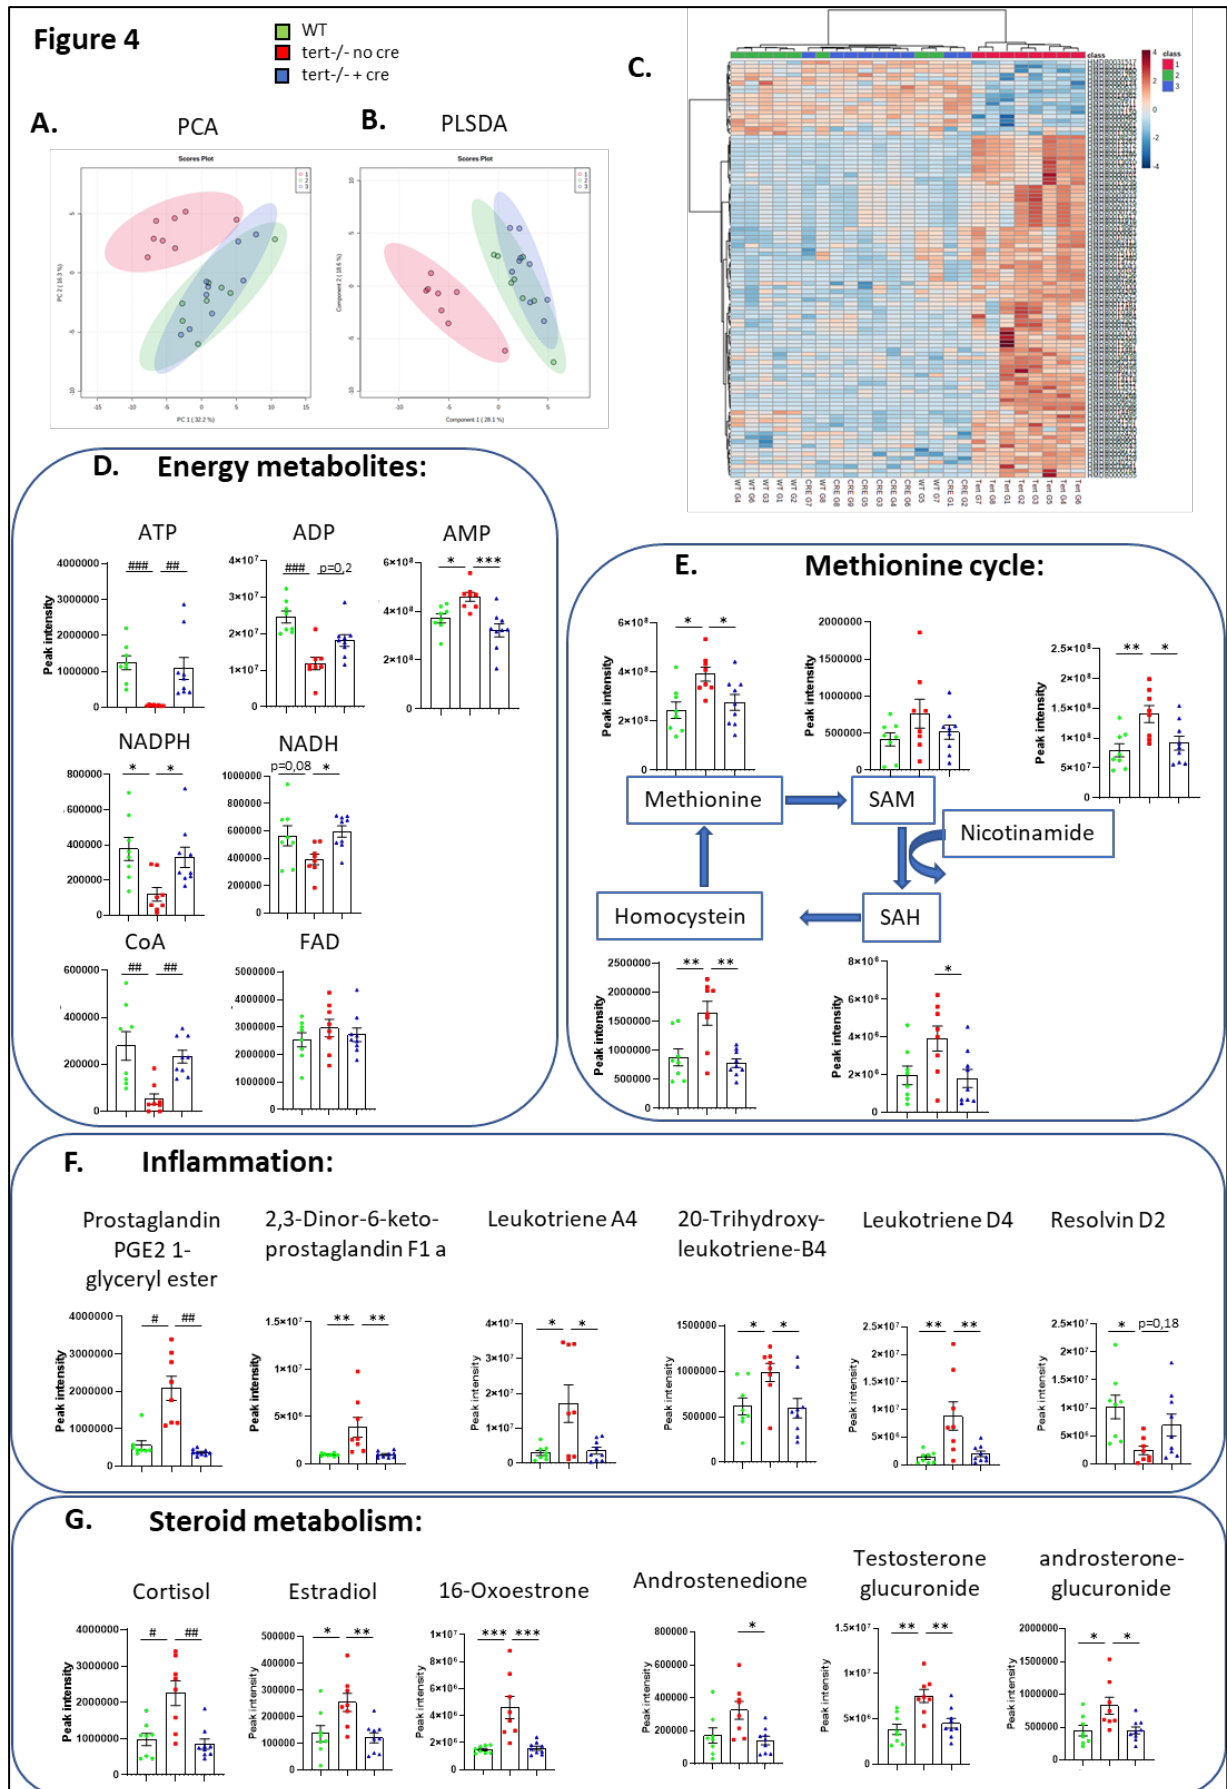

308 **Figure 4: Gut-specific telomerase activity rescues gut metabolomic profile.**  
309 **A-C.** PCA (**A.**); Partial Least Squares - Discriminant Analysis (PLSDA)(**B.**); and metabolite level Heatmap (**C.**)  
310 clustering analysis based on untargeted metabolomic data of 9-month-old gut samples. A clustering between *tert*-/  
311 *-* +Cre and WT while *tert*-/*-* No Cre group was clearly distinguishable from the other (N=8-9 per group). The  
312 score plot is represented with a confidence ellipse of 95%. **D-G.** Metabolomic analysis of energy metabolites (**D.**),  
313 methionine cycle pathway (**E.**), inflammatory metabolites (**F.**) and steroid metabolism (**G.**) in of 9-month-old gut  
314 samples. Metabolic alteration seen in gut of *tert*-/*-* No Cre fish are reverted to WT profile in *tert*-/*-* +Cre fish. All  
315 data are represented as mean +/- SEM (N=8-9 per condition; \* p-value<0.05; \*\* p-value<0.01, \*\*\* p-value<0.001,  
316 using one-way ANOVA and post-hoc Tuckey tests; # p-value<0.05; ## p-value<0.01, ### p-value<0.001, using  
317 Kruskal-Wallis and post-hoc Dunn's tests).  
318

### 319 **Systemic effects: Gut-specific telomerase expression rescues male fertility**

320 In light of the alterations of steroid metabolic profile observed in the gut of *tert*-/*-* No  
321 Cre and to explore the systemic impact of a gut-specific telomerase expression, we analysed  
322 aging phenotypes in the male reproductive system. As previously described<sup>14,17</sup>, we observed  
323 reduced cell proliferation and high senescence in testes of *tert*-/*-* No Cre fish (Figure 5A-D).  
324 Surprisingly, expression of the *tert* transgene specifically in the gut of *tert*-/*-* mutants led to a  
325 recovery of cell proliferation in the testes. Moreover, SA- $\beta$ -Gal and p15/16 mRNA levels were  
326 reduced to WT levels in *tert*-/*-* +Cre testes, while p21 mRNA levels remained similar to *tert*-/*-*  
327 No Cre fish. Similar to what we observed in the gut and consistent to our previous results for  
328 9-month-old fish<sup>17</sup>, apoptotic cell number were similar among the three genotypes  
329 (Supplementary figure 1B). Therefore, gut-specific telomerase activity rescues both  
330 proliferation and senescence in the reproductive system.

331 To ensure that these effects were not due to Fabp2 enterocyte promoter expression in  
332 other tissues, we performed RT-qPCR experiments on the testes of the three groups studied.  
333 While a clear induction of the *tert* transgene was observed in the gut of 9-month-old *tert*-/*-* +Cre  
334 fish compared to *tert*-/*-* No Cre fish, no expression of the transgene was detected in the testes  
335 (Supplementary figure 6A-B). Accordingly, we could not detect any difference on total *tert*  
336 mRNA levels when comparing testes of both groups. Consistently, there was no observable  
337 telomere elongation in the testes of *tert*-/*-* +Cre fish when compared to *tert*-/*-* No Cre  
338 (Supplementary figure 6C-E). As expected, in both these *tert*-/*-* groups, telomere length was  
339 similarly shorter when compared to WT fish. These control experiments support the systemic  
340 role of gut-specific telomerase activity in *tert*-/*-* fish.

341 Histopathology analysis of testes showed atrophy with a drastically reduced mature  
342 spermatids' content in the *tert*-/*-* No Cre fish compared to WT (Figure 5E-F), similar to what  
343 we previously reported<sup>14,17</sup>. In line with the cell proliferation and senescence rescue, gut-  
344 specific telomerase activity recovered these morphological defects. As in the gut, the increased  
345 neutrophil and eosinophil testes infiltrates present in *tert*-/*-* No Cre when compared to WT were  
346 also reverted in the *tert*-/*-* +Cre fish (Figure 5G-H).

347 Finally, male fertility decreases during natural aging of zebrafish and mice. This loss of  
348 fertility is accelerated in the murine and fish premature *tert*-/*-* aging models<sup>14,42</sup>. To provide  
349 further functional insight on the effect of gut aging delay on the reproductive function, we  
350 performed a male fertility assay where 9-month-old males of the three groups were individually  
351 crossed with young WT females. Percentage of eggs spawned by young females that were  
352 fertilized were scored as male fertility index. In accordance with a reduction of mature

353 spermatids' content, at 9 months of age, *tert*<sup>-/-</sup> No Cre male fish exhibit a drastic reduction of  
354 fertility compared to WT fish (Figure 5J). Strikingly, we observed a full recovery of male  
355 fertility in the *tert*<sup>-/-</sup> +Cre fish. Therefore, gut-specific telomerase activity not only improves  
356 cellular and morphological defects of the male reproductive system of *tert*<sup>-/-</sup> fish, but also  
357 rescues their age-dependent loss of fertility.  
358

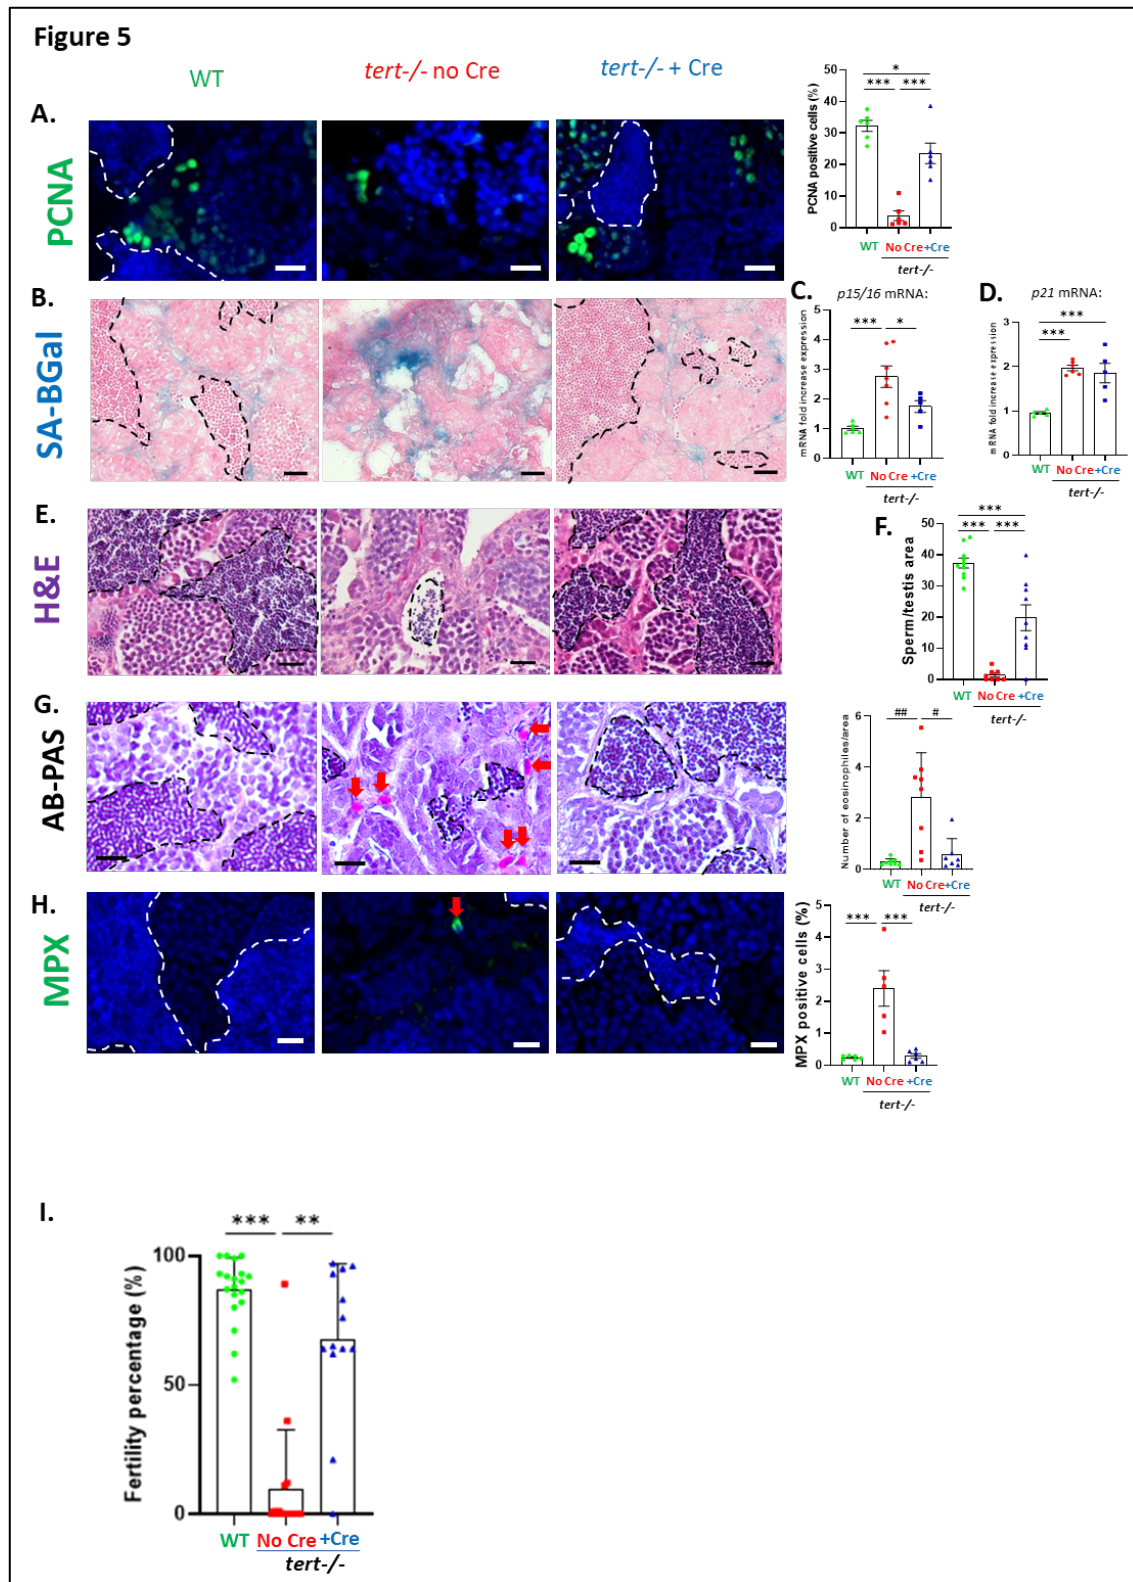



360 **Figure 5: Gut-specific telomerase activity rescues testis aging phenotypes.**

361 **A.** Representative immunofluorescence images of proliferation staining (PCNA marker; left panel) and  
362 quantification (right panel) in 9-month-old testis tissues. **B.** Representative image of SA- $\beta$ -Gal staining of 9-  
363 month-old testis cryosection. **C-D.** RT-qPCR analysis of senescence-associated genes *p15/16* (**C.**) and *p21* (**D.**)  
364 expression in 9-month-old testis samples. Delaying gut aging in *tert*<sup>-/-</sup> +Cre fish ameliorates testis proliferation  
365 and senescence compared to *tert*<sup>-/-</sup> No Cre fish. **E.** Representative hematoxylin and eosin-stained sections of testis  
366 from 9-month-old fish. **F.** Quantification of mature spermatids area over total testis area measured on histology  
367 images of 9-month-old fish testis. **G.** Representative AB-PAS staining images of 9-month-old fish testis (left  
368 panel). Number of pink-staining eosinophile cells (red arrows) are quantified in the right panel. **H.** Representative  
369 immunofluorescence images of neutrophil staining (MPX marker; left panel) and quantification (right panel) in 9-  
370 month-old testis tissues. **I.** Quantification of male fertility of 9-month-old fish determined by counting the  
371 percentage of fertilized eggs (detected by successful embryogenesis events) after crossing individually 9-month-  
372 old males with a young (3-6 month) WT female. Tert mRNA expression in gut of *tert*<sup>-/-</sup> (*tert*<sup>-/-</sup> +Cre fish) have  
373 beneficial systemic effects by improving testis function and reducing testis inflammation compared to *tert*<sup>-/-</sup> No  
374 Cre fish. Scale bar: 20 $\mu$ m. Dashed lines delineate mature spermatids area. All data are represented as mean +/-  
375 SEM (N=6-8 per condition; \* p-value<0.05; \*\* p-value<0.01, \*\*\* p-value<0.001, using one-way ANOVA and  
376 post-hoc Tuckey tests; # p-value<0.05; ## p-value<0.01, ### p-value<0.001, using Kruskal-Wallis and post-hoc  
377 Dunn's tests). All RT-qPCR graphs are representing mean  $\pm$  SEM mRNA fold increase after normalization by  
378 *rps11* gene expression levels.  
379

380 **Systemic effects: Gut-specific telomerase activity improves health and extends lifespan**

381 We then investigated whether the beneficial effects of gut aging delay could be observed  
382 beyond the reproductive system. Given the importance of anemia in telomeropathy patients<sup>43,44</sup>,  
383 we specifically investigated for improvements in the kidney marrow, the adult hematopoietic  
384 organ in zebrafish. Similar to testes and consistent with the increasing anemic profile, we  
385 detected lower levels of cell proliferation in the kidney marrow of *tert*<sup>-/-</sup> No Cre fish when  
386 compared to WT fish (Figure 6A). Notably, upon expression of *tert* transgene in the gut,  
387 proliferation rate in the kidney marrow was normalized to WT levels. Similarly, the increased  
388 senescence of *tert*<sup>-/-</sup> No Cre was also rescued in the *tert*<sup>-/-</sup> +Cre fish (Figure 6B-D). Like in the  
389 gut and testes, no differences in apoptosis were detected between the three groups  
390 (Supplementary figure 1C). We ruled out Fabp2-dependent expression of telomerase in the  
391 kidney marrow of *tert*<sup>-/-</sup> +Cre fish as we were unable to detect neither *tert* transgene expression  
392 nor differences in total *tert* mRNA expression when compared to *tert*<sup>-/-</sup> No Cre fish  
393 (Supplementary figure 6A-B). Consistently, a drastic shortening of telomere length was  
394 observed in *tert*<sup>-/-</sup> +Cre kidney marrow at 9 months of age similar to the telomere length of  
395 *tert*<sup>-/-</sup> No Cre fish (Supplementary figure 6E-H). Therefore, as in testes, gut-specific telomerase  
396 activity counteracted telomere-dependent cellular defects in the hematopoietic organ of *tert*<sup>-/-</sup>  
397 fish.

398 In contrast to other analysed organs, we detected a depletion of immune cells such as  
399 eosinophils and neutrophils in the kidney marrow of *tert*<sup>-/-</sup> No Cre when compared to WT fish  
400 (Figure 6F-G). These numbers were reverted to WT levels in *tert*<sup>-/-</sup> +Cre fish. Our results  
401 suggest a decreased reserve pool of eosinophils and neutrophils in *tert*<sup>-/-</sup> No Cre that is rescued  
402 by gut-specific telomerase activity. Decline of immune cells in the kidney marrow may  
403 constitute an early sign of hematopoietic dysfunction, comparable to the bone marrow failure  
404 described in telomeropathy patients<sup>43,44</sup>.

405



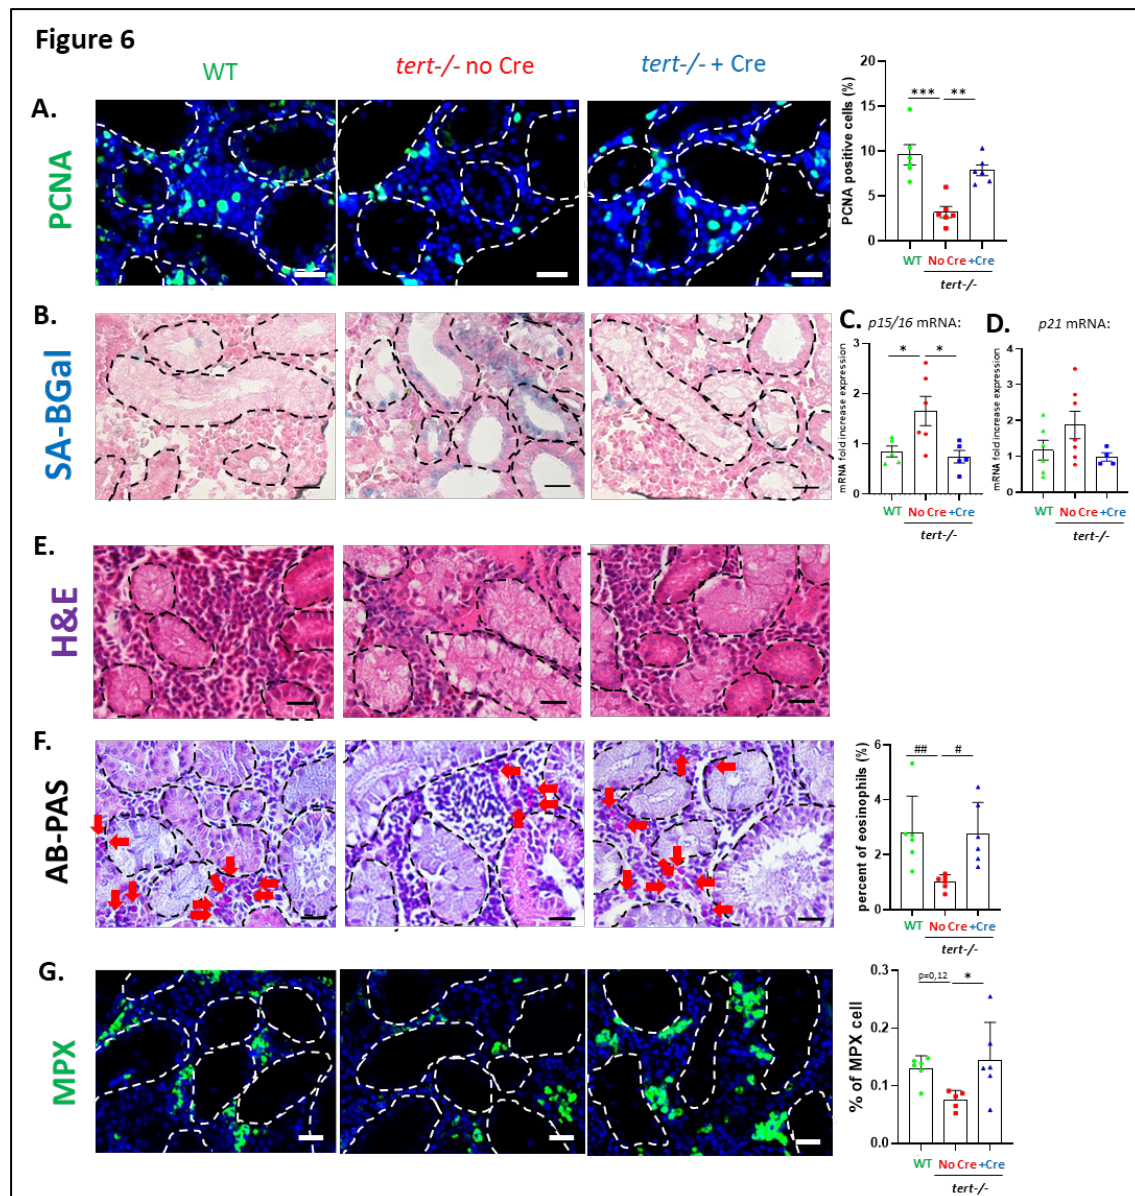

406  
407  
408  
409  
410  
411  
412  
413  
414  
415  
416  
417  
418  
419  
420  
421  
422  
423

**Figure 6: Gut-specific telomerase activity rescues aging of the hematopoietic system (kidney marrow).**

**A.** Representative immunofluorescence images of proliferation staining (PCNA marker; left panel) and quantification (right panel) in 9-month-old kidney marrow (KM) tissues. **B.** Representative image of SA-β-Gal staining of 9-month-old KM cryosection. **C-D.** RT-qPCR analysis of senescence-associated genes *p15/16* (**C.**) and *p21* (**D.**) expression in 9-month-old KM samples. Delaying gut aging in *tert*<sup>-/-</sup> +Cre fish ameliorates KM proliferation and senescence compared to *tert*<sup>-/-</sup> No Cre fish. **E.** Representative hematoxylin and eosin-stained sections of KM from 9-month-old fish. **F.** Representative AB-PAS staining images of 9-month-old fish KM (left panel). Number of pink-staining eosinophil cells (red arrows) are quantified in the right panel. **G.** Representative immunofluorescence images of neutrophil staining (MPX marker; left panel) and quantification (right panel) in 9-month-old KM tissues. Tert mRNA expression in gut of *tert*<sup>-/-</sup> (*tert*<sup>-/-</sup> +Cre fish) have beneficial systemic effects by improving neutrophil and eosinophil pool in compared to *tert*<sup>-/-</sup> No Cre fish. Scale bar: 20μm. Dashed lines delineate kidney tubules. All data are represented as mean ± SEM (N=5-8 per condition; \* p-value<0.05; \*\* p-value<0.01, \*\*\* p-value<0.001, using one-way ANOVA and post-hoc Tuckey tests; # p-value<0.05; ## p-value<0.01, ### p-value<0.001, using Kruskal-Wallis and post-hoc Dunn's tests). All RT-qPCR graphs are representing mean ± SEM mRNA fold increase after normalization by *rps11* gene expression levels.

424 Finally, considering that delaying gut aging rescued the aging phenotypes of distant  
425 organs, such as testes and kidney, we wondered whether telomerase activity in the gut of *tert*-  
426 /- would influence zebrafish lifespan. We grew male and female zebrafish of the three different  
427 groups and measured their life expectancy. As described previously<sup>14-16</sup>, accelerated telomere  
428 shortening of *tert*-/- No Cre fish reduces their lifespan to 12-18 months compared to >42 months  
429 in WT fish (Figure 7). Strikingly, delaying gut aging was sufficient to significantly extend the  
430 average lifespan of *tert*-/- fish. Average lifespan of *tert*-/- No Cre recovered from 17 months to  
431 24 months in *tert*-/- +Cre fish. However, this was not sufficient to fully rescue life expectancy  
432 to WT levels, suggesting that telomere shortening in other organs may become limiting in later  
433 stages. Therefore, counteracting gut aging not only delays aging of distant organs, but it is  
434 sufficient to extend lifespan of *tert*-/- mutants by 40%.  
435

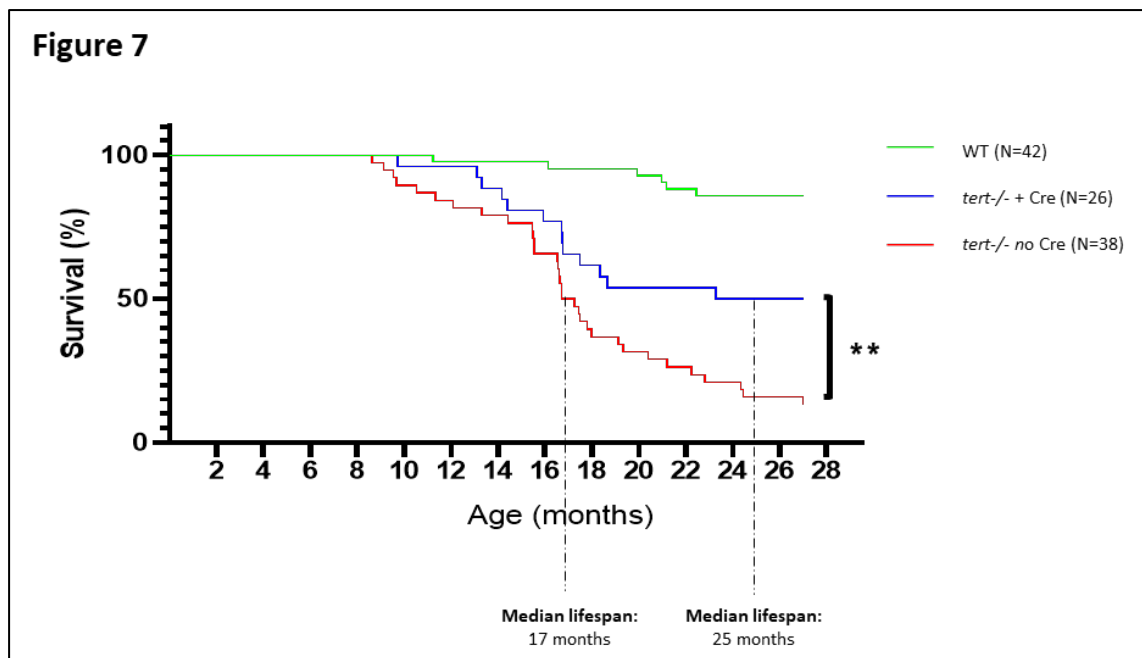

436  
437 **Figure 7: Gut-specific telomerase activity extends lifespan of *tert*-/- zebrafish.**  
438 Survival curve of WT (N=42), *tert*-/- No Cre (N=38) and *tert*-/- +Cre (N=26) zebrafish. Gut-specific telomerase  
439 activity extends lifespan, increasing median life from 17 months in *tert*-/- No Cre to 24 months in *tert*-/- +Cre fish  
440 (\*\* p-value<0.01 using Log-rank test).  
441

442 DISCUSSION:

443 The gut is a central organ in aging and it constitutes one of the most extensive and  
444 selective living barriers to the external environment. Besides its nutrient uptake function, it  
445 plays an important role in immune modulation and support a complex interaction with gut  
446 microbiota<sup>4</sup>.

447 In our study, we show that enterocyte-specific telomerase activity in *tert*<sup>-/-</sup> fish is  
448 sufficient to prolong maintenance of gut homeostasis with age. Not only it rescues proliferative  
449 defects and cell senescence, but also tissue integrity while reducing tissue inflammation.  
450 Interestingly, rescue of gut aging was observed even with a mild but significant telomere  
451 extension. Broad telomerase expression counteracts degenerative phenotypes of late generation  
452 *tert*<sup>-/-</sup> mice<sup>45,46</sup>. Improvement of aging phenotypes was observed not only in the gut but also in  
453 other organs such testes, spleen, brain or skin. However, in these studies, *tert* expression was  
454 not targeted to a specific organ, such as the gut. Consistent with our observations, the dePinho  
455 lab recently showed that telomere shortening in the mouse gut activates inflammation by a  
456 mechanism involving YAP<sup>47</sup>. In this work, a mosaic expression of *tert* in LGR5 positive cells  
457 of *tert*<sup>-/-</sup> mice partially ameliorated intestinal function and reduced inflammation of this tissue,  
458 but no systemic effects were reported apart from body weight rescue and a modest increase in  
459 survival. Consistently, we show that YAP target genes were likewise induced in *tert*<sup>-/-</sup> No Cre  
460 fish. These were rescued in the *tert*<sup>-/-</sup> +Cre fish that, not only reverted the YAP pathway, but  
461 also rescued local inflammation. Moreover, we now show that counteracting gut telomere  
462 dysfunction also delays remote organ dysfunction and overall organismal aging. It is worth  
463 noting that trace amounts of *fabp2* transcripts were previously reported in zebrafish in the liver,  
464 brain and kidney marrow but not in testis<sup>48</sup>. While in our study, we did not detect any *fabp2*  
465 promoter-dependant transgene expression and telomere extension in kidney marrow, we cannot  
466 exclude that a negligible *tert* transgene expression in non-proliferative tissues such as brain and  
467 liver might participate to the systemic improvement.

468 We report that delaying telomere-dependent gut aging has beneficial systemic effects.  
469 Expression of *tert* transgene exclusively in the gut of *tert*<sup>-/-</sup> fish reverted cellular defects in the  
470 reproductive (testes) and the hematopoietic (kidney marrow) systems, namely reduced cell  
471 proliferation and senescence. At the organ level, improving cellular turnover and reducing  
472 inflammation in testes allowed for replenishment of mature spermatids leading to functional  
473 rescue of male fertility. In parallel, we observed that neutrophil and eosinophil pools were  
474 restored in the hematopoietic system. Strikingly, in line with a systemic recovery, counteracting  
475 intestinal aging of *tert*<sup>-/-</sup> zebrafish extended lifespan by 40%. Notably, our study indicates that  
476 proliferative organs such as the reproductive or hematopoietic systems can conserve  
477 regenerative capacity even in a context of short telomeres. This has been observed in the rescue  
478 of telomerase deficiency by *tp53* mutations in several organisms, namely mice and  
479 zebrafish<sup>15,49</sup>. Thus, our study anticipates that maintenance of proliferative capacity and tissue  
480 integrity relies on external signals induced by an aging gut.

481 How would gut aging influence the entire organism? The recent years have seen a flurry  
482 of studies supporting the role of inflammation/SASP in inducing paracrine senescence in  
483 remote tissues<sup>50,51</sup>. Senescent cells accumulate with age in tissues and promote aging by  
484 secreting molecules such as inflammatory cytokines, chemokines and other molecules, also  
485 known as SASP<sup>51</sup>. Remarkably, clearance of these cells delay age-associated defects and lead

486 to lifespan extension<sup>5,6</sup>. We previously reported that some organs, such as kidney marrow,  
487 exhibit onset of cellular senescence before reaching critically short telomeres during zebrafish  
488 aging<sup>14,15</sup>. Interestingly, in the present study, we observed that enterocyte-specific telomerase  
489 activity in *tert*<sup>-/-</sup> fish not only counteracted senescence in the gut but also in distant organs. A  
490 paracrine signaling driven by inflammation/SASP factors secreted by an aged gut with short  
491 telomeres might therefore promote senescence in remote organs in *tert*<sup>-/-</sup> No Cre zebrafish.  
492 This mechanism would affect cell proliferation systemically and eventually lead to loss of tissue  
493 homeostasis in the entire organism.

494 Over the last decades, gut microbiota has captured the scientific community's interest  
495 by its implications in the etiology of several diseases including inflammatory bowel disease,  
496 type 2 diabetes, hypertension, liver diseases and depression<sup>52</sup>. Modification of gut microbiota  
497 dysbiosis has been linked to aging<sup>23,24</sup> and is involved in age-related systemic inflammation<sup>25</sup>.  
498 We show that *tert*<sup>-/-</sup> No Cre fish are afflicted by gut microbiota dysbiosis, with reduced  
499 population diversity and enrichment of pathogenic bacteria. Gut-specific telomerase activity  
500 recapitulated the bacterial diversity and composition observed in WT fish. Therefore, delaying  
501 gut aging counteracted gut microbiota dysbiosis. We anticipate that, as gut telomere shortening  
502 becomes limiting, increasingly dysbiotic microbiota exacerbates the age-dependent effects over  
503 the entire organism through its microbial components and/or by inducing systemic  
504 inflammation. This idea is supported by a recent work showing that stool transfers from young  
505 to middle-aged individuals was sufficient to extend lifespan of short-lived killifish<sup>53</sup>.

506 By analysing the metabolic profile of the gut in our model, we noticed an overall  
507 accumulation of methionine and its metabolites (SAM, SAH and homocystein) that is reverted  
508 to WT levels in *tert*<sup>-/-</sup> +Cre fish. Similar enrichment of methionine and its metabolites with age  
509 were reported in human and mice<sup>40,54</sup>. Interestingly, dietary methionine restriction or impeding  
510 SAM accumulation extends lifespan in different animal models<sup>4,55,56</sup>. Moreover,  
511 hyperhomocysteinemia has been implicated in several age-related disorder such as  
512 cardiovascular diseases, osteoporosis, renal and cognitive dysfunctions<sup>54</sup>. Mechanistically,  
513 deleterious effects of methionine and its metabolites involves DNA methylation drift, mTOR  
514 activation, inflammation and oxidative stress<sup>4,41,56</sup>. While it remains unclear why the levels of  
515 methionine and its metabolites are enriched in *tert*<sup>-/-</sup> gut, we anticipate/propose that  
516 propagation of these molecules throughout the zebrafish organism may precipitate systemic  
517 aging.

518 A growing list of evidence described the implication of the gut in different systemic  
519 physiological and pathological processes, often involving gut microbiota. Overall, the present  
520 work describes a central role of telomere shortening in the gut during the aging of a vertebrate  
521 organism. While it provides several mechanistic clues, it remains unclear how this organ  
522 influences aging of the entire organism. This includes microbiota dysbiosis,  
523 inflammation/SASP and dysregulation of methionine metabolism. Finally, our study  
524 demonstrates that targeting aging of a unique organ, the gut, is an exciting strategy to extend  
525 health span and lifespan.

526



## 527 MATERIAL AND METHODS:

### 528 **Ethics statement**

529 Zebrafish work was conducted according to local and international institutional guidelines and were  
530 approved in France by the Animal Care Committee of the IRCAN, the regional (CIEPAL Cote d'Azur  
531 #697) and national (French Ministry of Research #27673-2020092817202619) authorities and in  
532 Portugal by the Ethical Committee of the Instituto Gulbenkian de Ciência and approved by the  
533 competent Portuguese authority (Direcção Geral de Alimentação e Veterinária; approval number:  
534 0421/000/000/2015).

### 536 **Plasmid construct**

537 Zebrafish *tert* cDNA was obtained using TertFL- pCR-II-Topo plasmid kindly provided by S. Kishi  
538 laboratory<sup>57</sup>. Using Gibson assembly recombination methods, *tert* cDNA and *eCFP* cDNA were linked  
539 by *T2A* sequence and inserted into *Ubi: loxP-dsRed-loxP-EGFP* vector plasmid (a kind gift from Zon's  
540 lab derived from *ubi:Switch* and *lmo2:Switch* constructs<sup>58</sup>). Then, the intestine- specific intestinal fatty  
541 acid binding protein promoter (-2.3kb *fabp2* -also called *ifabp*-) was amplified by high fidelity PCR  
542 (iProof™ High-Fidelity DNA Polymerase; Bio-Rad, Hercules, CA, USA) from p5E-2.3ifabp plasmid  
543 (kindly gifted by J. Rawls laboratory). -2.3kb *fabp2* PCR product was then cloned into the *Ubi: LoxP-*  
544 *dsRed-loxP-tert-T2A-CFP* using *sfl*/*FseI* digestion to provide the final construct: *Fabp2: LoxP-dsRed-*  
545 *loxP-tert-T2A-CFP*.

546

### 547 **Generation of transgenic fish**

548 *Tol2* mRNA was synthesized with SP6 RNA polymerase from pCS2FA-transposase plasmid (Tol2Kit)  
549 using mMACHINE SP6 transcription kit (Invitrogen; Cergy Pontoise, France). One-cell  
550 stage zebrafish embryos were micro-injected with 1,4 nL of a mixture containing 25 ng/μL of linearized  
551 plasmid and 100 ng/μL of *Tol2* mRNA, diluted with RNase-free water. Injected fish were raised to  
552 adulthood and germline transmitting fish were then selected and out-crossed to wild type AB until  
553 obtaining a single copy transgenic line Tg(*Fabp2: LoxP-dsRed-loxP-tert-T2A-CFP*).

554

### 555 **Zebrafish lines and maintenance**

556 Zebrafish were maintained in accordance with Institutional and National animal care protocols.  
557 Generation and maintenance of the telomerase mutant line *tert* AB/hu3430 (referred in this work as  
558 *tert*+/-) were previously described<sup>14,15,17</sup>. This line was outcrossed with Tg(*Fabp2: LoxP-dsRed-loxP-*  
559 *tert-T2A-CFP*) line to obtain a stock line combining both transgenics. All stocks were kept in  
560 heterozygous form for *tert* mutation and maintained strictly by outcrossing to AB strains to avoid  
561 haploinsufficiency effects in the progeny.

562 Experimental fish were obtained by crossing *tert*+/- fish with *tert*+/-; *Fabp2: LoxP-dsRed-loxP-tert-*  
563 *T2A-CFP*. The generated sibling embryos were then micro-injected with 1.4nL of either 25ng/μL Cre  
564 mRNA diluted in RNase-free water (Cre induced fish), or RNase-free water alone (mock injected fish).  
565 This experimental set up provided sibling fish that are either *tert*-/- ; *Fabp2: LoxP-dsRed-loxP-tert-T2A-*  
566 *CFP* (mock injected *tert*-/- referred to as "*tert*-/- No Cre"), *tert*-/- ; *Fabp2: tert-T2A-CFP* (Cre induced  
567 *tert*-/- referred to as "*tert*-/- +Cre") or *tert*+/+; *Fabp2: LoxP-dsRed-loxP-tert-T2A-CFP* (mock injected  
568 wild type referred to as "WT"). Overall characterization of these three genotypes was performed in F1  
569 sibling animals at 9 months of age. Due to a male sex bias in our crosses, that affected mostly *tert*-/  
570 progeny, we were unable to obtain significant numbers of females for analysis and so all of our data  
571 except survival analysis are restricted to males.

572

### 573 **Senescence-associated beta-galactosidase staining**

574 Tissues were fixed with 4% PFA during 3 hours at 4°C. After being washed in PBS, they were incubated  
575 in 30% sucrose (Sigma, MO, USA) at 4°C until sinking (24-48hours). Fixed tissues were then embedded  
576 in OCT medium (M-M France, Brignais, France) and kept at -80C. Senescence-associated beta-  
577 galactosidase staining was then performed on slides of 5μm cryosections using Senescence Beta-  
578 Galactosidase staining kit (#9860, Cell Signalling Technology, Danvers, MA, USA) following  
579 manufacturer's instructions. After 16h (testis, kidney marrow) or 3h (gut) incubations with the X-Gal



580 staining solution at 37°C, slides were washed with PBS and counterstained for one minute with Nuclear  
581 Fast Red (NFR) solution (Sigma, MO, USA) prior to being dehydrated and mounted.

582

### 583 **Telomere restriction fragment (TRF) analysis by Southern blot**

584 Isolated tissues were first lysed at 50°C overnight in lysis buffer (Fermentas #K0512; Waltham, MA,  
585 USA) supplemented with 1 mg/ml Proteinase K (Sigma, MO, USA) and RNase A (1:100 dilution,  
586 Sigma, MO, USA). Genomic DNA was then extracted by equilibrated phenol-chloroform (Sigma, MO,  
587 USA) and chloroform-isoamyl alcohol extraction (Sigma, MO, USA). Same amounts of gDNA were  
588 digested with RSAI and HINF1 enzymes (NEB, MA, USA) for 12 h at 37°C. After digestion, samples  
589 were loaded on a 0.6% agarose gel, in 0.5% TBE buffer, and run on a CHEF-DR11 pulse field  
590 electrophoresis apparatus (Bio-Rad). The electrophoresis conditions were as follow: initial switch 1s,  
591 final switch 6s; voltage 4V/cm; at 4°C for 20 h. Gels were then processed for Southern blotting using a  
592 1.6 kb telomere probe, (TTAGGG)<sub>n</sub>, labelled with [ $\alpha$ -32P]-dCTP.

593

### 594 **Fertility assays**

595 In order to assess male fertility, 9-month-old male individuals from the three different genotypes were  
596 separately housed overnight in external breeding tanks with a single young (3-6 month old) WT female.  
597 Breeding pairs were left to cross and to lay eggs the following morning. Embryos were collected  
598 approximately 2 hours post fertilization (hpf) and allowed to develop at 28°C. Assessment of egg  
599 fertilization and embryo viability was conducted between 2 and 4 hpf. At least 14 independent crosses  
600 were conducted for each genotype to evaluate male fertility. Only successful breeding trials, defined as  
601 events where clutch of eggs was laid by a female, were scored.

602

### 603 **Histology**

604 Zebrafish were sacrificed by lethal dose of 1g/L of MS-222 (Sigma, MO, USA), fixed for 72 hr in 10%  
605 neutral buffered formalin and decalcified in 0.5M EDTA for 48 hr at room temperature. Whole fish were  
606 then paraffin-embedded in order to perform five micrometer sagittal section slides. Slides were stained  
607 with haematoxylin and eosin for histopathological analysis. In parallel, slides were stained by Alcian  
608 Blue (AB) solution pH 2.5 (Sigma, MO, USA) followed by Periodic acid-Schiff staining (kit #395B,  
609 Sigma, MO, USA) according to manufacturer's instructions. Microphotographs (N $\geq$ 6 fish per  
610 genotype) were acquired in a Leica DM4000B microscope coupled to a Leica DFC425 C camera.

611

### 612 **Immunofluorescence**

613 Deparaffinized and rehydrated slides were microwaved 20min at 550W in citrate buffer (10 mM Sodium  
614 Citrate, pH 6) to allow for antigen retrieval. Slides were washed two times in PBS for 5 minutes each  
615 and blocked for 1 hour at RT in 0.5% Triton, 5% normal goat serum in PBS (blocking solution).  
616 Subsequently, slides were incubated overnight at 4°C with 1:50 dilution of primary antibody in blocking  
617 solution. The following primary antibodies were used: mouse monoclonal antibody against Proliferation  
618 Cell Nuclear Antigen (PCNA, sc56 Santa Cruz, CA, USA, 1:50 dilution) and rabbit polyclonal against  
619 myeloperoxidase (MPX, GTX128379; Irvine, CA, USA, 1:50 dilution). After two PBS washes,  
620 overnight incubation at 4°C was performed with 1:500 dilution of goat anti-rabbit or anti-mouse  
621 secondary antibodies Alexa Fluor 488 (Invitrogen; Cergy Pontoise, France). Finally, after DAPI staining  
622 (Sigma, MO, USA), slides were mounted DAKO Fluorescence Mounting Medium (Sigma, MO, USA).  
623 Apoptosis was detected using the In SituCell Death Detection Kit (Roche, Bâle, Switzerland)  
624 as previously described<sup>14,17</sup>. Briefly, deparaffinated sections were permeabilized by one hour  
625 incubation at 37°C with 40  $\mu$ g/ml Proteinase K in 10 mM Tris-HCl pH 7.4. After being washed with  
626 PBS, slides were incubated one hour at 37°C with TUNEL labelling mix (according to manufacturer's  
627 instructions) prior to DAPI staining and mounting.

628 Immunofluorescence images were acquired on Delta Vision Elite (GE Healthcare, Chicago, IL, USA)  
629 using a OLYMPUS 20x/0,75 objective. For quantitative and comparative imaging, equivalent image  
630 acquisition parameters were used. The percentage of positive nuclei was determined by counting a total  
631 of 500–1000 cells per slide (N $\geq$ 6 zebrafish per genotype).

632

### 633 **Real-time quantitative PCR and RNA sequencing**

634 Zebrafish were sacrificed by lethal dose of 1g/L of MS-222 (Sigma, MO, USA) and each tissue (gonads,  
635 gut and kidney marrow) were dissected and immediately snap-frozen in liquid nitrogen. RNA extraction  
636 was performed by disrupting individual tissues with a pestle in TRIzol (Invitrogen, UK) followed by  
637 chloroform extractions. Quality of RNA samples was assessed through BioAnalyzer (Agilent 2100, CA,  
638 USA). Retro-transcription into cDNA was performed using QuantiTect Reverse Transcription kit  
639 (Qiagen, Hilden, Germany).

640 Quantitative PCR (qPCR) was performed using FastStart Universal SYBR Green Master mix (Roche,  
641 Bâle, Switzerland) and an 7900HT Fast Real-Time PCR Detection System (ThermoFisher, Waltham,  
642 MA, USA). qPCRs were carried out in triplicate for each cDNA sample. Relative mRNA expression  
643 was normalized against *rps11* mRNA expression using the  $2^{-\Delta\Delta CT}$  method as compared to controle  
644 condition. Primer sequences are listed in Supplementary table.

645 RNA sequencing was performed by the Beijing Genomics Institute (BGI; Hongkong), using for each  
646 condition, biological triplicates consisting for each of a pool of two individual tissues. DNase treated  
647 total RNA samples were enriched for mRNAs using oligo dT magnetic beads. In turn, mRNAs were  
648 fragmented into 200 bp-size fragments and the first strands of cDNAs were synthesized by using  
649 random-hexamers. In order to generate library products, double stranded cDNAs from the second strand  
650 synthesis were then purified by magnetic beads followed by A-tailing and RNA adaptors ligation. The  
651 library was amplified with phi29 to make DNA nanoball (DNB) which had more than 300 copies of one  
652 molecular. Pair ended 150 bases reads were sequenced in the way of combinatorial Probe-Anchor  
653 Synthesis (cPAS) on DNBseq platform and 100M clean reads per sample was generated. Raw data  
654 with adapter sequences or low-quality sequences was filtered SOAPnuke software developed by BGI.

655 The RNA-seq reads were analyzed via an internal pipeline for transcript quantification, normalization,  
656 and comparison. Briefly, the human reference genome assembly vGRCh38 (retrieved from  
657 <http://www.ensembl.org>) and gencode annotation v37 (retrieved from <https://www.gencodegenes.org/>)  
658 were processed by gffread v0.12.2 to extract human reference transcriptome. Based on this extracted  
659 reference transcriptome, Salmon v1.4 was used to perform transcript quantification via quasi-mapping.  
660 RUVseq v1.20.0 was used for data transformation by "rlog" and data normalization by replicates.  
661 DESeq2 v1.26.0 was used for differentially expressed gene (DEG) analysis. The false discovery rate  
662 (FDR) cutoffs of 0.1 were explored for the DEG analysis. Based on the resulting DEG candidate gene  
663 lists, clusterProfiler v4.0 was employed for Gene Ontology (GO) analysis and Gene Set Enrichment  
664 Analysis (GSEA), based on which KEGG pathway enrichment analyses were further performed.

#### Supplementary Table – List of primers used in

##### RT-qPCR expression analysis.

| Gene name                | Primer sequences                                                               |
|--------------------------|--------------------------------------------------------------------------------|
| <i>cdkn2a/b</i> (p15/16) | forward - 5' GAGGATGAACTGACCACAGCA 3'<br>reverse - 5' CAAGAGCCAAAGGTGCGTTAC 3' |
| <i>cdkn1a</i> (p21)      | forward - 5' CAGCGGGTTTACAGTTTCAGC 3'<br>reverse - 5' TGAACGTAGGATCCGCTTGT 3'  |
| <i>tnfa</i>              | forward - 5' AGGCAATTTCACTTCCAAGGC 3'<br>reverse - 5' GGTCTGGTCATCTCTCCAGT 3'  |
| <i>tert</i>              | forward - 5' CGGTATGACGGCTATCACT 3'<br>reverse - 5' TAAACGGCCTCCACAGATT 3'     |
| <i>tert</i> transgene    | forward - 5' GCATGTTAGAAGACTTCCTCTGC 3'<br>reverse - 5' TTCCTCTCCAGAATCCCCC 3' |
| <i>rps11</i>             | forward - 5' ACAGAAATGCCCTTCACTG 3'<br>reverse - 5' GCCTTTCTCAAACGGTTG 3'      |
| <i>il-6</i>              | forward - 5' TCAACTTCTCCAGCGTGATG 3'<br>reverse - 5' TCTTCCCTCTTTCTCTCTG 3'    |
| <i>cyr 61</i>            | forward - 5' CCGTGTCACATGTACATGGG 3'<br>reverse - 5' GGTGCATGAAAGAGCTCGTC 3'   |
| <i>ctgf</i>              | forward - 5' ACTCCCTCGTCAAACACC 3'<br>reverse - 5' GGGACCGTATGTCTCTCTCT 3'     |
| <i>claudin-2</i>         | forward - 5' GCAACACCTCACTGCTGAAC 3'<br>reverse - 5' TTGCCAGTAGGGGAGAAGA 3'    |

666

## 667 **Metagenomics**

668 gDNA was first extracted from isolated gut of sibling fish as described for Telomere restriction fragment  
669 (TRF) analysis. The V3-V4 hypervariable regions of bacterial 16S rRNA genes were amplified by PCR  
670 with Phusion® High-Fidelity PCR MasterMix (New England Biolabs, Ipswich, MA, USA) using  
671 specific primer as previously described<sup>59</sup>. PCR products were mixed at equal density ratios and purified  
672 with Qiagen Gel Extraction Kit (Qiagen, Germany). The sequencing libraries were generated using  
673 NEBNext® Ultra™ DNA Library Prep Kit and sequenced on Illumina NovaSeq 6000 paired-end  
674 platform to generate 250 bp paired-end raw reads. Sequences analysis were performed using Uparse  
675 software with all the effective tags. Sequences with  $\geq 97\%$  similarity were assigned to the same OTUs.  
676 Representative sequence for each OTU was screened for further annotation. For each representative  
677 sequence, Mothur software was performed against the SSUrRNA database of SILVA Database for  
678 species annotation at each taxonomic rank (Threshold:0.8~1). QIIME and R were used to calculate alpha  
679 and beta diversity metrics and generate plots. Principal Coordinate Analysis (PCoA) was performed to  
680 get principal coordinates and visualize from complex, multidimensional data.  
681  
682

## 683 **Metabolomic analysis**

684 Each frozen gut sample was homogenized in methanol 600  $\mu$ L of methanol (HPLC grade, Merck  
685 Millipore, USA) and incubated overnight at  $-20^{\circ}\text{C}$ . Tubes were vortexed and incubated overnight at  $-$   
686  $20^{\circ}\text{C}$  for protein precipitation. After centrifugations, supernatants were removed, dried using a  
687 SpeedVAC concentrator (SVC100H, SAVANT, Thermo Fisher Scientific, Illkirch, France),  
688 resuspended in 80  $\mu$ L of a 20:80 acetonitrile-H<sub>2</sub>O mixture (HPLC grade, Merck Millipore) and stored  
689 at  $-20^{\circ}\text{C}$  until use for metabolomic analysis.

690 Chromatographic analysis was performed with the DIONEX Ultimate 3000 HPLC system coupled to a  
691 chromatographic column (Phenomenex Synergi 4 u Hydro-RP 80A 250\_3.0 mm) set at  $40^{\circ}\text{C}$  and a flow  
692 rate of 0.9 mL/min. Gradients of mobile phases (mobile phase A: 0.1% formic acid in water and mobile  
693 phase B: 0.1% formic acid in acetonitrile) were performed over a total of 25 min. MS analysis was  
694 carried out on a Thermo Scientific Exactive Plus Benchtop Orbitrap mass spectrometer. The heated  
695 electrospray ionization source (HESI II) was used in positive and negative ion modes. The instrument  
696 was operated in full scan mode from  $m/z$  67 to  $m/z$  1000. The post-treatment of data was performed  
697 using the MZmine2 version 2.39 (<http://mzmine.github.io/>). Metabolites were identified using the  
698 Human Metabolome Database version 5.0 (<http://www.hmdb.ca>). We only used ions identified as  
699  $[\text{M}+\text{H}]^{+}$  adducts in the positive mode and  $[\text{M}-\text{H}]^{-}$  adducts in the negative mode and ions found in all the  
700 samples after gap filling.  
701

## 702 **Statistical analysis**

703 Graphs and statistical analyses were performed in GraphPad Prism8 software (San Diego, CA, USA),  
704 using one-way ANOVA test with Tuckey's post-correction or Kruskal-Wallis test with Dunn's post-hoc  
705 test. A critical value for significance of  $p < 0.05$  was used throughout the study. For survival analysis,  
706 Log-rank tests were performed using GraphPad Prism8 in order to determine statistical differences of  
707 survival curves.

708 Untargeted metabolomic analysis of gut samples were processed using statistical analysis [one factor]  
709 modules proposed by MetaboAnalyst 5.0 (<https://www.metaboanalyst.ca>). For each comparison, peak  
710 intensities were Log transformed. Clustering analysis were performed using Principal Component  
711 Analysis (PCA), Partial Least Squares - Discriminant Analysis (PLS-DA), and Heatmap tools provided  
712 by MetaboAnalyst.  
713

714

## 715 **ACKNOWLEDGEMENTS:**

716 We thank members from the Telomeres and Genome Stability and the Telomere Shortening and Cancer  
717 Laboratories for fruitful discussions. We are grateful to Leonor Saúde (Instituto de Medicina Molecular)  
718 and Ana Rita Araújo (IPMC) for critically reading our paper. This work was supported by the Fondation  
719 Arc pour la Recherche sur le Cancer (PJA20161205137) and the Fondation pour la Recherche Médicale

720 FRM (EQU201903007804). MEM was supported by a postdoctoral fellowship from the Ville de Nice.  
721 This work was also supported by the Université Côte d'Azur - Académie 4 (Installation Grant: Action  
722 2 - 2019) and the Howard Hughes Medical Institute International Early Career Scientist grant awarded  
723 to MGF. We thank the Instituto Gulbenkian de Ciência (IGC) histology unit, the IGC imaging unit, for  
724 assistance with experimental planning, sample processing and data collection and the IGC Fish Facility  
725 for excellent animal care. IGC Fish Facility is financed by Congento LISBOA-01-0145-FEDER-  
726 022170, co-financed by FCT (Portugal) and Lisboa2020, under the PORTUGAL2020 agreement  
727 (European Regional Development Fund). The work was also performed using the PEMAV fish facility,  
728 Imaging core facility (PICMI) and the Genomics facilities at the IRCAN supported by FEDER, Région  
729 Provence Alpes-Côte d'Azur, Conseil Départemental 06, ITMO Cancer Aviesan (plan cancer),  
730 Cancéropole Provence Alpes-Côte d'Azur, Gis Ibis, CNRS and Inserm.

731  
732 **AUTHOR CONTRIBUTIONS**

733 T.P. and G.J-M. contributed to metabolomic analyses; J-X.Y. and D.K performed transcriptomics  
734 analyses; M.E.M. performed the experiments and carried out data analyses; M.E.M. and M.G.F.  
735 conceived the study, designed the experiments, and wrote the manuscript. M.G.F. supervised the work.

736  
737 **COMPETING INTERESTS**

738 The authors declare that they have no competing interests.

739

740 SUPPLEMENTARY FIGURES:

741

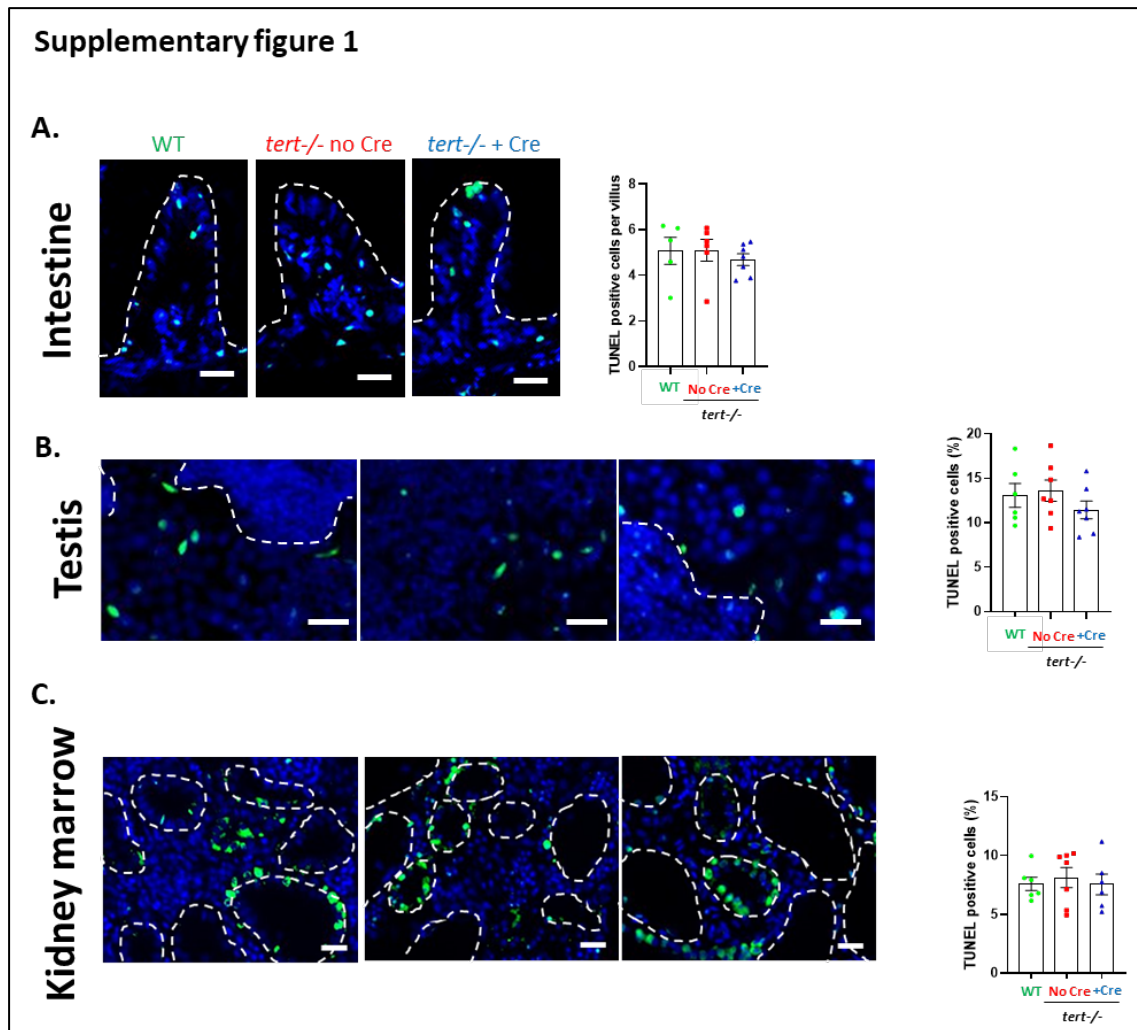

742

743 **Supplementary figure 1: 9-month-old fish did not exhibit apoptosis differences between**  
744 **conditions.**

745 A-C. Representative immunofluorescence images of apoptotic cell staining (TUNEL assay; left panel) and  
746 quantification (right panel) in gut (A.), testis (B.), or KM (C.) tissues of 9-month-old zebrafish. Scale bar: 20µm.  
747 Dashed lines delineate gut villi (A.), mature spermatid area (B.), or kidney tubules (C.). At 9 months of age, no  
748 differences in apoptosis were detected in gut, testis and KM comparing *tert*<sup>-/-</sup> No Cre, *tert*<sup>-/-</sup> +Cre and WT fish  
749 All data are represented as mean +/- SEM (N=5-7 per condition; no significance was detected comparing all  
750 conditions and using one-way ANOVA and post-hoc Tuckey tests).  
751



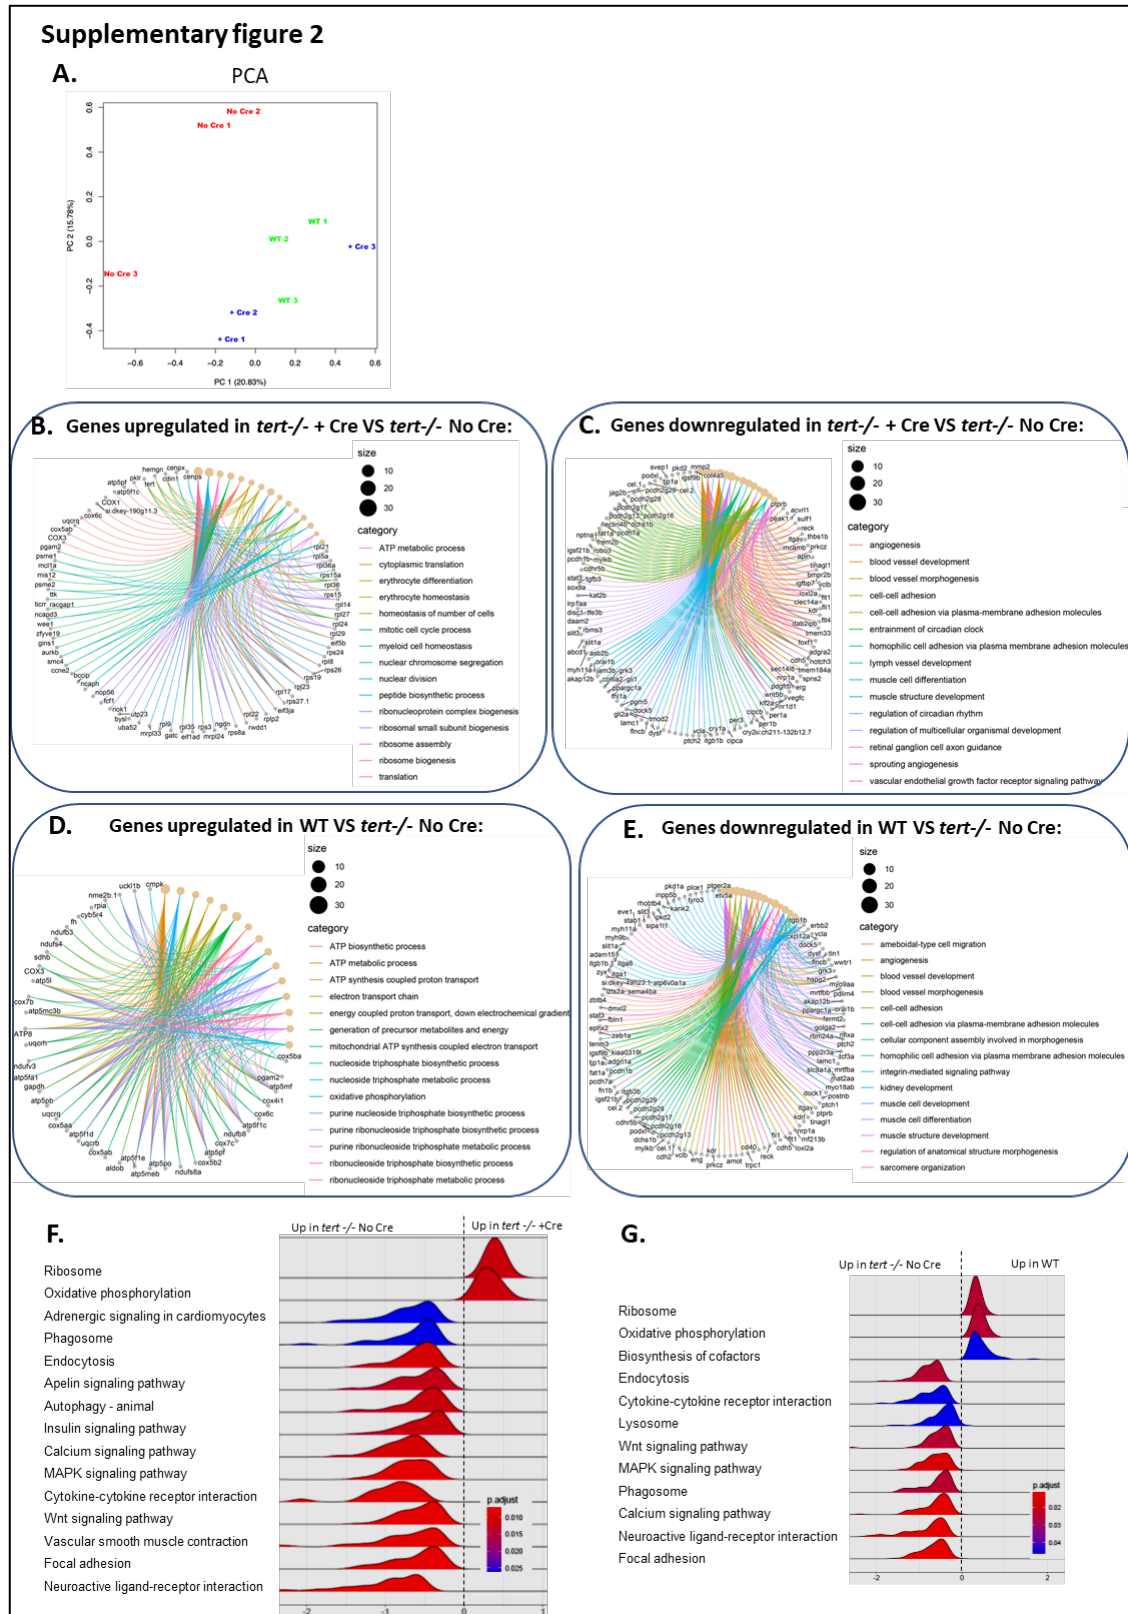

752  
753  
754  
755  
756  
757  
758  
759

**Supplementary figure 2: Gut specific *tert* expression rescues gut transcriptomic profile.**

**A.** Principal Component Analysis (PCA) based on untargeted transcriptomic data of 9-month-old gut samples. A clustering between *tert*<sup>-/-</sup> +Cre and WT while *tert*<sup>-/-</sup> No Cre group was clearly distinguishable from *tert*<sup>-/-</sup> No Cre fish (N=3 per group). **B-C.** Identification of Differentially Expressed Genes (DEGs) and their biological process categories (Gene Ontology -GO- Term analysis; FDR<0.1) that are downregulated (**B.**) or upregulated (**C.**) in the gut of 9-month-old *tert*<sup>-/-</sup> +Cre fish compared to *tert*<sup>-/-</sup> No Cre fish. **D-E.** Identification of Differentially Expressed Genes (DEGs) and their biological process categories (GO Term analysis; FDR<0.1)

760 that are downregulated (D.) or upregulated (E.) in the gut of 9-month-old WT fish compared to *tert*<sup>-/-</sup> No Cre  
 761 fish. Genes associated with morphogenesis, angiogenesis, cell-cell adhesion and muscle development are  
 762 concomitantly downregulated compared to *tert*<sup>-/-</sup> No Cre reflecting the requirement of tissue repair in *tert*<sup>-/-</sup> No  
 763 Cre fish. In parallel, ATP metabolism, ribonucleotide biosynthesis and mitotic cell cycle processes pathways are  
 764 enriched in *tert*<sup>-/-</sup> +Cre and WT fish compared to *tert*<sup>-/-</sup> No Cre suggesting mitochondrial defects and reduced  
 765 proliferation in *tert*<sup>-/-</sup> No Cre fish. F-G. Identification of KEGG (Kyoto Encyclopedia of Genes and Genomes)  
 766 term using GSEA (Gene Set Enrichment Analysis) in the gut of 9-month-old *tert*<sup>-/-</sup> +Cre (F.) or WT (G.) fish  
 767 compared to *tert*<sup>-/-</sup> No Cre. Genes associated with Ribosome and Oxidative phosphorylation pathways are  
 768 enriched in the gut of both *tert*<sup>-/-</sup> +Cre and WT fish reflecting higher translation process and mitochondrial  
 769 function compared to *tert*<sup>-/-</sup> No Cre. KEGG terms related to Cytokine-cytokine receptor interaction, Phagosome,  
 770 Endocytosis, Neuroactive ligand-receptor interaction, Focal adhesion, Wnt signaling, MAPK signaling pathway  
 771 and Calcium signaling pathway are reduced in both *tert*<sup>-/-</sup> +Cre and WT fish compared to *tert*<sup>-/-</sup> No Cre  
 772 suggesting higher inflammation and requirement for tissue repair mechanisms.  
 773

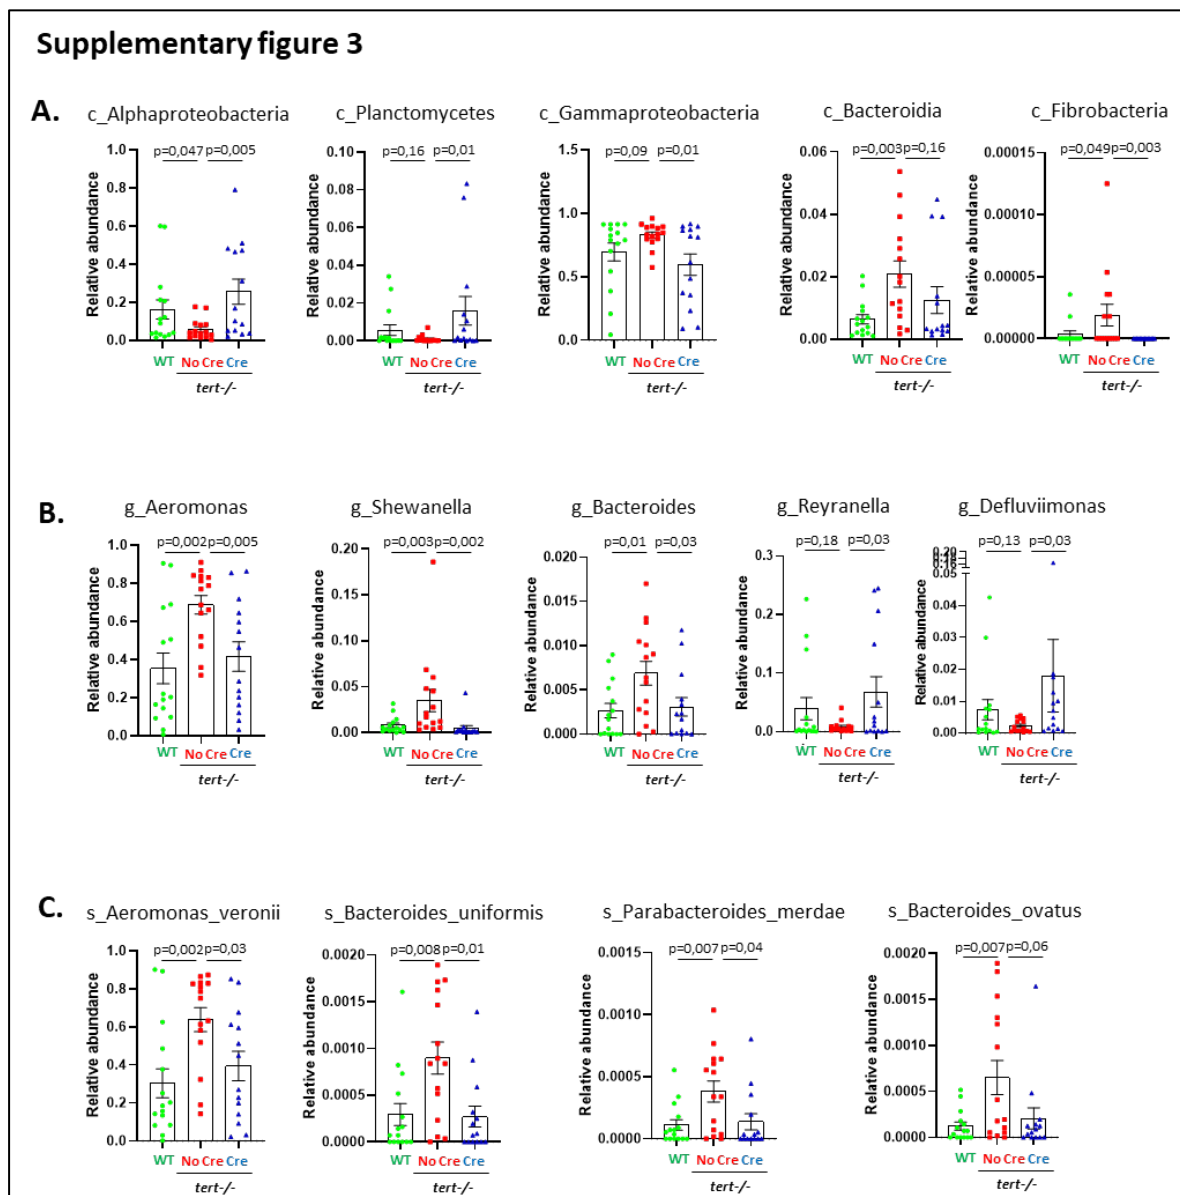

774  
 775 **Supplementary figure 3: Gut-specific telomerase activity rescues alterations of gut**  
 776 **microbiota composition.**

777 A-C. Relative abundance analysis of bacteria at the level of class (A.); genus (B.) and species (C.). N=14-15; p  
 778 values were determined using Multiple hypothesis-test for sparsely-sampled features and false discovery rate  
 779 (FDR). Tert expression in gut of *tert*<sup>-/-</sup> fish (*tert*<sup>-/-</sup> +Cre) recapitulates bacteria abundance at the class and  
 780 species levels to WT profile compared to *tert*<sup>-/-</sup> No Cre where pathogenic bacteria are enriched.

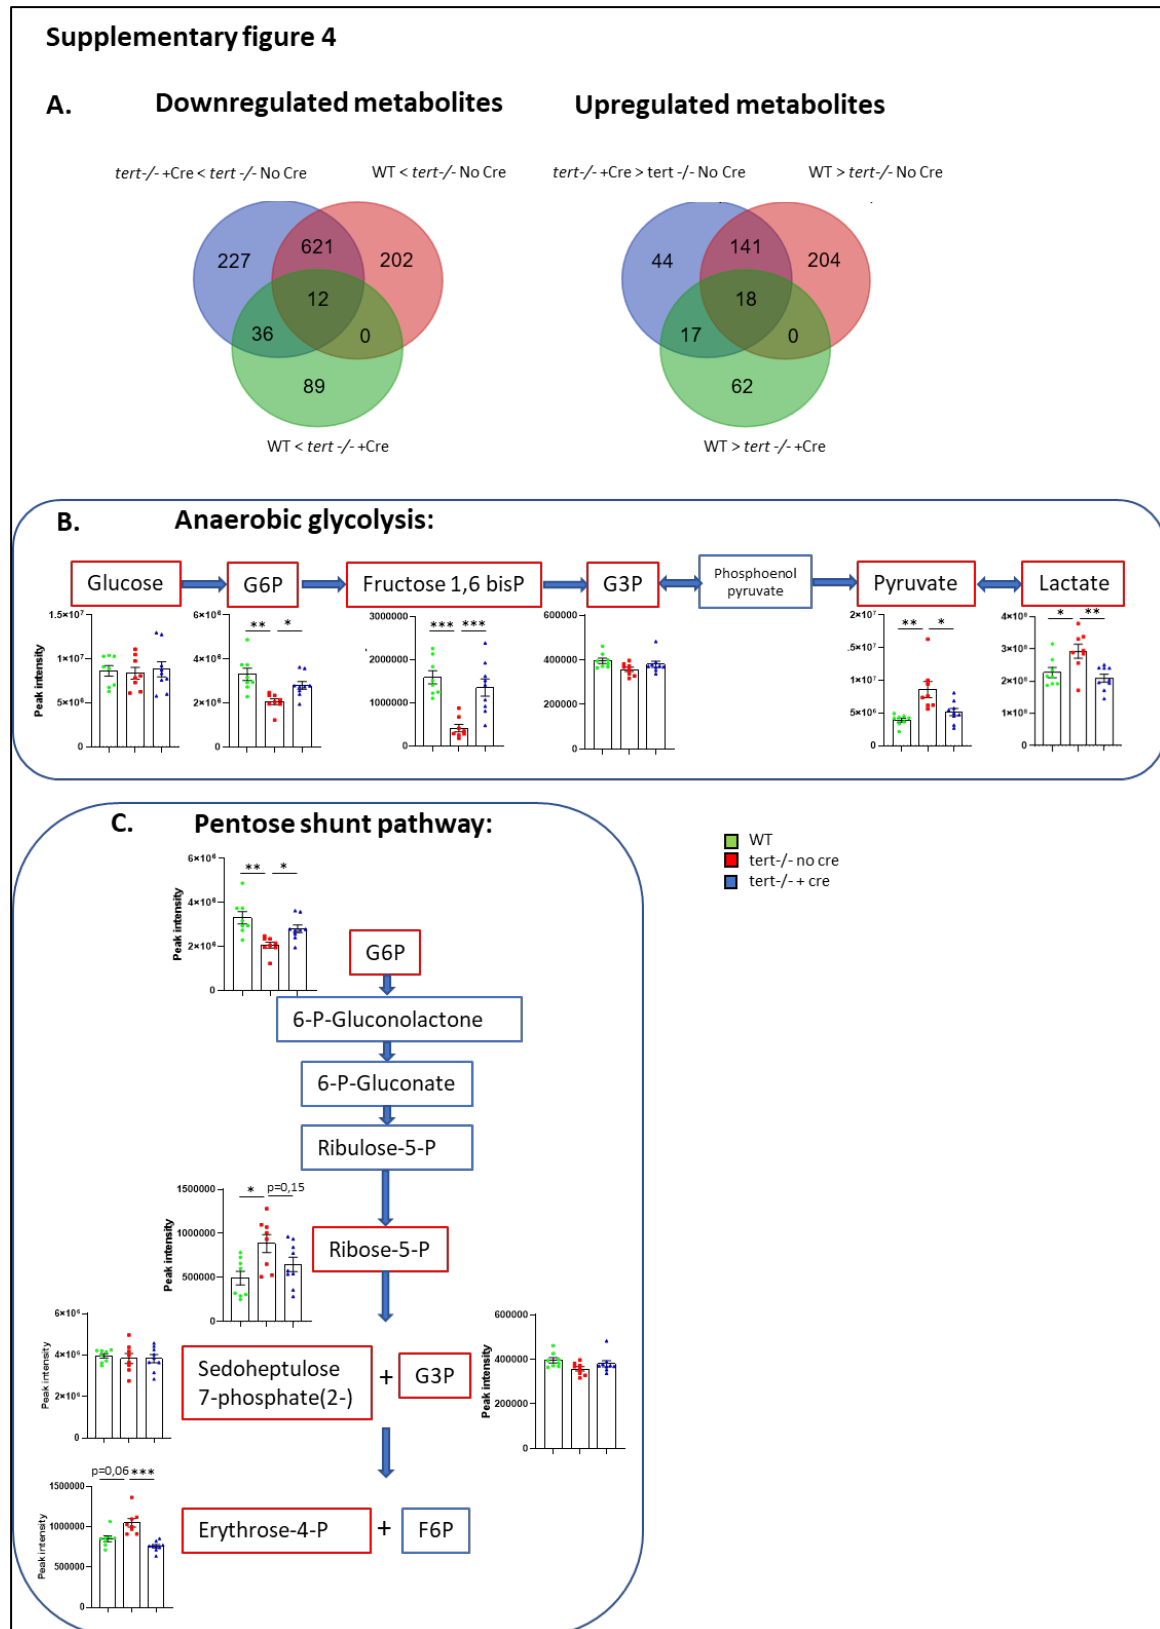

781

782 **Supplementary figure 4: Gut-specific telomerase activity rescues gut metabolomic**  
 783 **profile.**

784 **A.** Venn diagram representing downregulated (left panel) or upregulated (right panel) metabolites comparing the  
 785 three conditions in gut of 9-month-old fish. The majority of metabolites detected in the gut of 9 months-old fish  
 786 are concomitantly down or up-regulated in *tert*<sup>-/-</sup> +Cre and WT groups compared to *tert*<sup>-/-</sup> No Cre fish. **B-C.**  
 787 Metabolomic analysis of the anaerobic glycolysis (**B.**) and pentose shunt pathways (**C.**) in gut of 9-month-old

788 **Supplementary figure 4 continued:**

789 fish. Anaerobic glycolysis and pentose shunt metabolic profiles are rescued to WT levels in the gut of *tert*<sup>-/-</sup>  
790 +Cre compared *tert*<sup>-/-</sup> No Cre fish. All data are represented as mean +/- SEM (N=8-9 per condition; \* p-  
791 value<0.05; \*\* p-value<0.01, \*\*\* p-value<0.001, using one-way ANOVA and post-hoc Tuckey tests). Red  
792 squares: detected metabolites; blue squares: undetected metabolites.

793

794

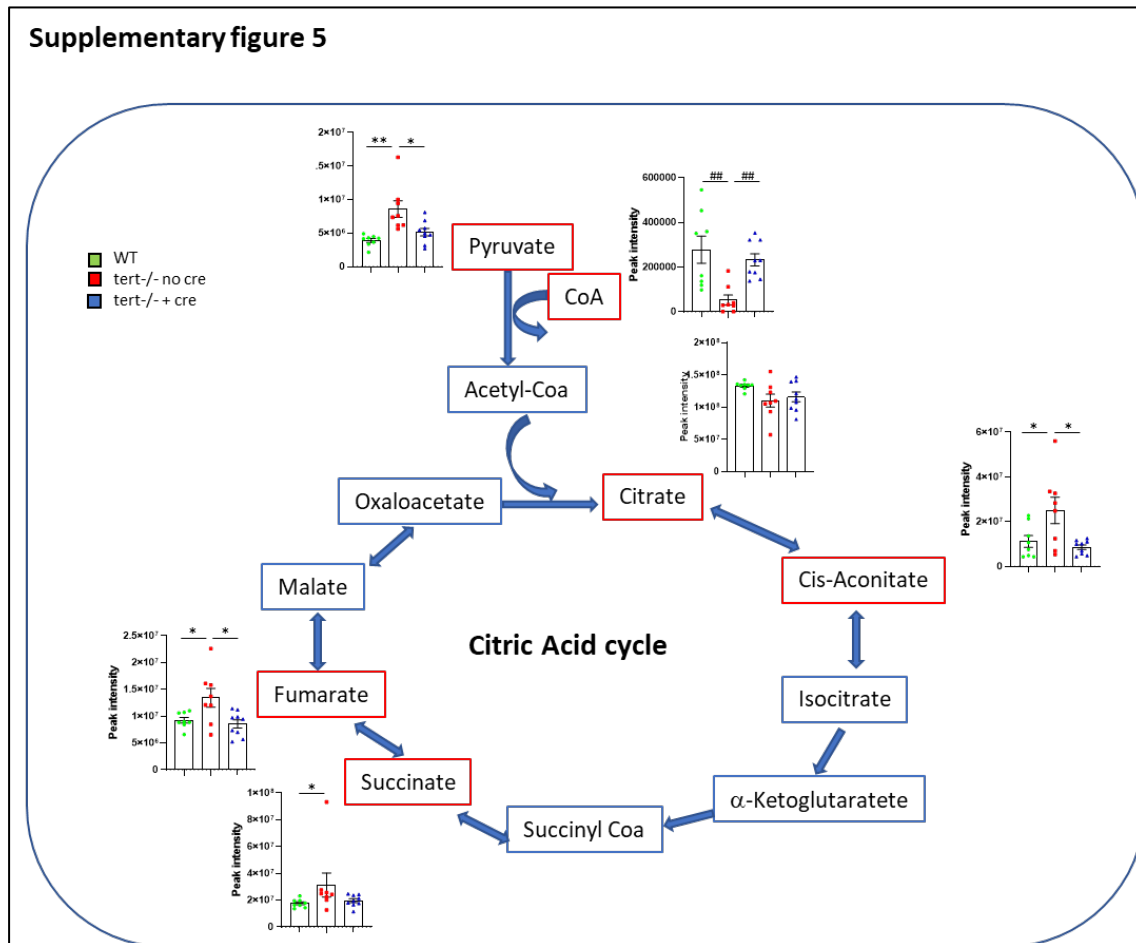

796

797 **Supplementary figure 5: Gut-specific telomerase activity rescues citric acid cycle**  
798 **metabolism alterations in the gut of *tert*<sup>-/-</sup> fish.**

799 Metabolomic analysis of the citric acid cycle gut of 9-month-old fish. Citric cycle metabolic profile in the gut of  
800 *tert*<sup>-/-</sup> +Cre is similar to WT compared *tert*<sup>-/-</sup> No Cre fish. All data are represented as mean +/- SEM (N=8-9 per  
801 condition; \* p-value<0.05; \*\* p-value<0.01, using one-way ANOVA and post-hoc Tuckey tests; ## p-  
802 value<0.01, using Kruskal-Wallis and post-hoc Dunn's tests). Red squares: detected metabolites; blue squares:  
803 undetected metabolites.



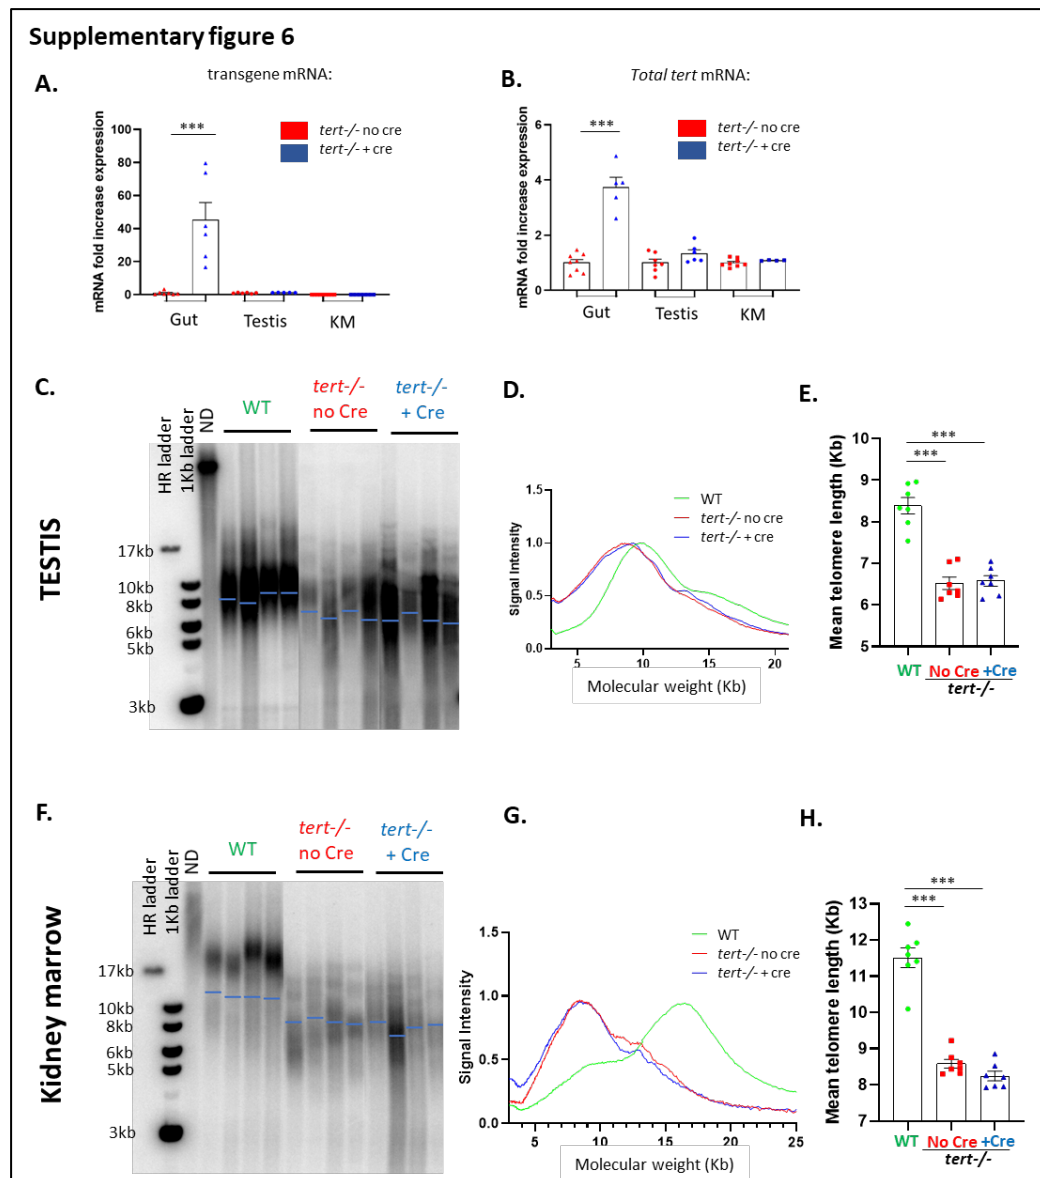

804

805 **Supplementary figure 6: Cre-mediated *tert* transgene expression is specific to gut tissue.**  
 806 **A-B.** RT-qPCR analysis of *tert* transgene mRNA (**A.**) and total *tert* mRNA (**B.**; endogenous + transgene)  
 807 expression in gut, testis of KM extracts from 9-month-old *tert*<sup>-/-</sup> No Cre and *tert*<sup>-/-</sup> +Cre fish. RT-qPCR graphs  
 808 are representing mean ± SEM mRNA fold increase after normalization by *rps11* gene expression levels (N=5-8;  
 809 \*\*\* p-value<0.001, using one-way ANOVA and post-hoc Tuckey tests). While *tert* transgene transcription is  
 810 induced by Cre injection in the gut of *tert*<sup>-/-</sup> fish compared to *tert*<sup>-/-</sup> No Cre, no transgene expression was  
 811 detected in testis and KM of *tert*<sup>-/-</sup> +Cre fish. **C.** Representative images of telomere restriction fragment (TRF)  
 812 analysis by Southern Blot of genomic DNA extracted from 9-month-old testis samples and quantifications of  
 813 mean telomere length (blue bars). **D.** TRF mean densitometry curves from 9-month-old testis samples (N= 6-7).  
 814 **E.** Quantification of mean telomere length analyzed by TRF on testis from 9-month-old fish. Data are  
 815 represented as mean +/- SEM (N=6-7; \*\*\* p-value<0.001, using one-way ANOVA and post-hoc Tuckey tests).  
 816 **F.** Representative images of telomere restriction fragment (TRF) analysis by Southern Blot of genomic DNA  
 817 extracted from 9-month-old KM samples and quantifications of mean telomere length (blue bars). **G.** TRF mean  
 818 densitometry curves from 9-month-old KM samples (N= 6-7). **H.** Quantification of mean telomere length  
 819 analyzed by TRF on KM from 9-month-old fish. Data are represented as mean +/- SEM (N=6-7; \*\*\* p-  
 820 value<0.001, using one-way ANOVA and post-hoc Tuckey tests). In accordance with lack of transgene  
 821 expression in testis and KM, no difference in telomere length was detected in these organs when comparing *tert*<sup>-/-</sup>  
 822 +Cre and *tert*<sup>-/-</sup> No Cre fish.

823

## 824 **Bibliography:**

- 825 1. Kenyon, C., Chang, J., Gensch, E., Rudner, A. & Tabtiang, R. A *C. elegans* mutant that  
826 lives twice as long as wild type. *Nature* **366**, 461–4 (1993).
- 827 2. López-Otín, C., Blasco, M. A., Partridge, L., Serrano, M. & Kroemer, G. The  
828 Hallmarks of Aging. *Cell* **153**, 1194–1217 (2013).
- 829 3. Kenyon, C. J. The genetics of ageing. *Nature* **464**, 504–512 (2010).
- 830 4. Funk, M. C., Zhou, J. & Boutros, M. Ageing, metabolism and the intestine. *EMBO*  
831 *Rep.* **21**, e50047 (2020).
- 832 5. Kirkland, J. L. & Tchkonja, T. Senolytic drugs: from discovery to translation. *J. Intern.*  
833 *Med.* **288**, 518–536 (2020).
- 834 6. Baker, D. J. *et al.* Clearance of p16Ink4a-positive senescent cells delays ageing-  
835 associated disorders. *Nature* **479**, 232–6 (2011).
- 836 7. Blackburn, E. H., Greider, C. W. & Szostak, J. W. Telomeres and telomerase: the path  
837 from maize, Tetrahymena and yeast to human cancer and aging. *Nat. Med.* **12**, 1133–8  
838 (2006).
- 839 8. Shay, J. W. & Wright, W. E. Hayflick, his limit, and cellular ageing. *Nat. Rev. Mol.*  
840 *Cell Biol.* **1**, 72–76 (2000).
- 841 9. Blackburn, E. H. & Francisco, S. Telomeres. *Encycl. LIFE Sci.* 1–7 (2001).
- 842 10. Yui, J., Chiu, C. P. & Lansdorp, P. M. Telomerase activity in candidate stem cells from  
843 fetal liver and adult bone marrow. *Blood* **91**, 3255–3262 (1998).
- 844 11. Artandi, S. E. & DePinho, R. a. Telomeres and telomerase in cancer. *Carcinogenesis*  
845 **31**, 9–18 (2009).
- 846 12. Mitchell, J. R., Wood, E. & Collins, K. A telomerase component is defective in the  
847 human disease dyskeratosis congenita. *Nature* **402**, 551–5 (1999).
- 848 13. Opresko, P. L. & Shay, J. W. Telomere-associated aging disorders. *Ageing Res. Rev.*  
849 **33**, 52–66 (2017).
- 850 14. Carneiro, M. C. *et al.* Short Telomeres in Key Tissues Initiate Local and Systemic  
851 Aging in Zebrafish. *PLoS Genet.* **12**, (2016).
- 852 15. Henriques, C. M., Carneiro, M. C., Tenente, I. M., Jacinto, A. & Ferreira, M. G.  
853 Telomerase is required for zebrafish lifespan. *PLoS Genet.* **9**, e1003214 (2013).
- 854 16. Anhelin, M. *et al.* Premature aging in telomerase-deficient zebrafish. *Dis. Model.*  
855 *Mech.* **6**, 1101–12 (2013).
- 856 17. El Maï, M., Marzullo, M., de Castro, I. P. & Ferreira, M. G. Opposing p53 and  
857 mTOR/AKT promote an in vivo switch from apoptosis to senescence upon telomere  
858 shortening in zebrafish. *Elife* **9**, 1–26 (2020).
- 859 18. Demanelis, K. *et al.* Determinants of telomere length across human tissues. *Science*  
860 **369**, (2020).
- 861 19. Jonassaint, N. L., Guo, N., Califano, J. A., Montgomery, E. A. & Armanios, M. The  
862 gastrointestinal manifestations of telomere-mediated disease. *Aging Cell* **12**, 319–23  
863 (2013).
- 864 20. Glousker, G., Touzot, F., Revy, P., Tzfati, Y. & Savage, S. A. Unraveling the  
865 pathogenesis of Hoyeraal-Hreidarsson syndrome, a complex telomere biology disorder.  
866 *Br. J. Haematol.* **170**, 457–71 (2015).
- 867 21. Kinouchi, Y. *et al.* Telomere shortening in the colonic mucosa of patients with  
868 ulcerative colitis. *J. Gastroenterol.* **33**, 343–8 (1998).
- 869 22. Risques, R. A. *et al.* Ulcerative colitis is a disease of accelerated colon aging: evidence  
870 from telomere attrition and DNA damage. *Gastroenterology* **135**, 410–8 (2008).
- 871 23. Biagi, E. *et al.* Through ageing, and beyond: gut microbiota and inflammatory status in

- 872 seniors and centenarians. *PLoS One* **5**, e10667 (2010).
- 873 24. O'Toole, P. W. & Jeffery, I. B. Gut microbiota and aging. *Science* **350**, 1214–5 (2015).
- 874 25. Thevaranjan, N. *et al.* Age-Associated Microbial Dysbiosis Promotes Intestinal  
875 Permeability, Systemic Inflammation, and Macrophage Dysfunction. *Cell Host*  
876 *Microbe* **21**, 455–466.e4 (2017).
- 877 26. Kanther, M. *et al.* Microbial colonization induces dynamic temporal and spatial  
878 patterns of NF- $\kappa$ B activation in the zebrafish digestive tract. *Gastroenterology* **141**,  
879 197–207 (2011).
- 880 27. Ma, Y.-C. *et al.* YAP in epithelium senses gut barrier loss to deploy defenses against  
881 pathogens. *PLOS Pathog.* **16**, e1008766 (2020).
- 882 28. Gregorieff, A., Liu, Y., Inanlou, M. R., Khomchuk, Y. & Wrana, J. L. Yap-dependent  
883 reprogramming of Lgr5+ stem cells drives intestinal regeneration and cancer. *Nature*  
884 **526**, 715–718 (2015).
- 885 29. Tran, L. & Greenwood-Van Meerveld, B. Age-associated remodeling of the intestinal  
886 epithelial barrier. *Journals Gerontol. - Ser. A Biol. Sci. Med. Sci.* **68**, 1045–1056  
887 (2013).
- 888 30. Raju, P. *et al.* Inactivation of paracellular cation-selective claudin-2 channels attenuates  
889 immune-mediated experimental colitis in mice. *J. Clin. Invest.* **130**, 5197–5208 (2020).
- 890 31. Clark, R. I. *et al.* Distinct Shifts in Microbiota Composition during Drosophila Aging  
891 Impair Intestinal Function and Drive Mortality. *Cell Rep.* **12**, 1656–67 (2015).
- 892 32. Claesson, M. J. *et al.* Gut microbiota composition correlates with diet and health in the  
893 elderly. *Nature* **488**, 178–84 (2012).
- 894 33. Batut, J., Andersson, S. G. E. & O'Callaghan, D. The evolution of chronic infection  
895 strategies in the  $\alpha$ -proteobacteria. *Nat. Rev. Microbiol.* **2**, 933–945 (2004).
- 896 34. Huang, Y. T. *et al.* Genomic and phylogenetic characterization of *Shewanella*  
897 *xiamenensis* isolated from giant grouper (*Epinephelus lanceolatus*) in Taiwan.  
898 *Zoonoses Public Health* **66**, 679–685 (2019).
- 899 35. Mukhopadhyay, I. *et al.* A comprehensive evaluation of colonic mucosal isolates of  
900 *Sutterella wadsworthensis* from inflammatory bowel disease. *PLoS One* **6**, 1–10 (2011).
- 901 36. Hiippala, K., Kainulainen, V., Kalliomäki, M., Arkkila, P. & Satokari, R. Mucosal  
902 prevalence and interactions with the epithelium indicate commensalism of *Sutterella*  
903 *spp.* *Front. Microbiol.* **7**, 1–13 (2016).
- 904 37. Round, J. L. & Mazmanian, S. K. The gut microbiota shapes intestinal immune  
905 responses during health and disease. *Nat. Rev. Immunol.* **9**, 313–323 (2009).
- 906 38. Saitoh, S. *et al.* *Bacteroides ovatus* as the predominant commensal intestinal microbe  
907 causing a systemic antibody response in inflammatory bowel disease. *Clin. Diagn. Lab.*  
908 *Immunol.* **9**, 54–59 (2002).
- 909 39. Kenny, H. A. *et al.* Quantitative high throughput screening using a primary human  
910 three-dimensional organotypic culture predicts in vivo efficacy. *Nat. Commun.* **6**, 6220  
911 (2015).
- 912 40. López-Otín, C., Galluzzi, L., Freije, J. M. P., Madeo, F. & Kroemer, G. Metabolic  
913 Control of Longevity. *Cell* **166**, 802–821 (2016).
- 914 41. Srivastava, S. Emerging insights into the metabolic alterations in aging using  
915 metabolomics. *Metabolites* **9**, 1–16 (2019).
- 916 42. Rudolph, K. L. *et al.* Longevity, stress response, and cancer in aging telomerase-  
917 deficient mice. *Cell* **96**, 701–712 (1999).
- 918 43. Townsley, D. M., Dumitriu, B. & Young, N. S. Bone marrow failure and the  
919 telomeropathies. *Blood* **124**, 2775–2783 (2014).
- 920 44. Thongon, N. *et al.* Hematopoiesis under telomere attrition at the single-cell resolution.  
921 *Nat. Commun.* **12**, (2021).

- 922 45. Jaskelioff, M. *et al.* Telomerase reactivation reverses tissue degeneration in aged  
923 telomerase-deficient mice. *Nature* **469**, 102–106 (2011).
- 924 46. Tomás-Loba, A. *et al.* Telomerase Reverse Transcriptase Delays Aging in Cancer-  
925 Resistant Mice. *Cell* **135**, 609–622 (2008).
- 926 47. Chakravarti, D. *et al.* Telomere dysfunction activates YAP1 to drive tissue  
927 inflammation. *Nat. Commun.* **11**, 4766 (2020).
- 928 48. Esteves, A. *et al.* Fatty acid binding proteins have the potential to channel dietary fatty  
929 acids into enterocyte nuclei. *J. Lipid Res.* **57**, 219–232 (2016).
- 930 49. Chin, L. *et al.* P53 Deficiency Rescues the Adverse Effects of Telomere Loss and  
931 Cooperates With Telomere Dysfunction To Accelerate Carcinogenesis. *Cell* **97**, 527–  
932 538 (1999).
- 933 50. Paramos-de-Carvalho, D., Jacinto, A. & Saúde, L. The right time for senescence. *Elife*  
934 **10**, 139–141 (2021).
- 935 51. Campisi, J. Aging, cellular senescence, and cancer. *Annu. Rev. Physiol.* **75**, 685–705  
936 (2013).
- 937 52. Fan, Y. & Pedersen, O. Gut microbiota in human metabolic health and disease. *Nat.*  
938 *Rev. Microbiol.* **19**, 55–71 (2021).
- 939 53. Smith, P. *et al.* Regulation of life span by the gut microbiota in the short-lived African  
940 turquoise killifish. *Elife* **6**, 120980 (2017).
- 941 54. Ostrakhovitch, E. A. & Tabibzadeh, S. Homocysteine and age-associated disorders.  
942 *Ageing Res. Rev.* **49**, 144–164 (2019).
- 943 55. Bárcena, C. *et al.* Methionine Restriction Extends Lifespan in Progeroid Mice and  
944 Alters Lipid and Bile Acid Metabolism. *Cell Rep.* **24**, 2392–2403 (2018).
- 945 56. Kitada, M., Ogura, Y., Monno, I., Xu, J. & Koya, D. Effect of methionine restriction on  
946 aging: Its relationship to oxidative stress. *Biomedicines* **9**, 1–15 (2021).
- 947 57. Imamura, S. *et al.* A non-canonical function of zebrafish telomerase reverse  
948 transcriptase is required for developmental hematopoiesis. *PLoS One* **3**, (2008).
- 949 58. Mosimann, C. *et al.* Ubiquitous transgene expression and Cre-based recombination  
950 driven by the ubiquitin promoter in zebrafish. *Development* **138**, 169–177 (2011).
- 951 59. Caporaso, J. G. *et al.* Ultra-high-throughput microbial community analysis on the  
952 Illumina HiSeq and MiSeq platforms. *ISME J.* **6**, 1621–1624 (2012).
- 953
